1 **A functional study of all 40 *C. elegans* insulin-like peptides**

2

3 **Shanqing Zheng<sup>1</sup>, Hilton Chiu<sup>1</sup>, Jeffrey Boudreau<sup>1</sup>, Tony Papanicolaou<sup>1</sup>, William Bendena<sup>1</sup>, Ian**

4 **Chin-Sang<sup>1,2</sup>**

5 1: Department of Biology, Queen's University, Kingston, ON, Canada, K7L 3N6

6 2: Corresponding Author, [chinsang@queensu.ca](mailto:chinsang@queensu.ca)

7

8

9

10

11

12

13

14

15

16

17

18

## 19 **Abstract**

20 The human genome encodes ten insulin-like genes, whereas the *C. elegans* genome remarkably  
21 encodes forty insulin-like genes. The roles of insulin/insulin-like peptide ligands (INS) in *C.*  
22 *elegans* are not well understood. The functional redundancy of the forty INS genes makes it  
23 challenging to address their functions by using knock out strategies. Here, we individually  
24 overexpressed each of the forty *ins* genes pan-neuronally, and monitored multiple phenotypes  
25 including: L1 arrest life span, neuroblast divisions under L1 arrest, dauer formation and fat  
26 accumulation, as readouts to characterize the functions of each INS *in vivo*. Of the 40 INS  
27 peptides, we found functions for 35 INS peptides and functionally categorized each as agonists,  
28 antagonists or of pleiotropic function. In particular, we found that 9 of 16 agonistic INS peptides  
29 shortened L1 arrest life span and promoted neuroblast divisions during L1 arrest. Our study  
30 revealed that a subset of  $\beta$ -class INS peptides that contain a distinct F peptide sequence are  
31 agonists. Our work is the first to categorize the structures of INS peptides and relate these  
32 structures to the functions of all forty INS peptides *in vivo*. Our findings will promote the study  
33 of insulin function on development, metabolism, and aging-related diseases.

## 34 **Author Summary:**

35 Insulin and insulin-like growth factors are found in all animals and regulate many physiological  
36 and developmental processes. The human genome has 10 insulin-like peptides including the  
37 well characterized insulin hormone. The nematode *C. elegans* has 40 insulin-like (INS) peptide  
38 genes. All 40 INS peptides have been knocked out but no single INS gene knock out resembles  
39 the loss of the *C. elegans* insulin receptor suggesting that the other INS peptides can

40 compensate when one INS is lost. We have used a genetic approach to overexpress each of the  
41 40 INS peptides in *C. elegans* and have identified *in vivo* function for 35 of the 40 INS peptides.  
42 Like the human insulin and IGF-1, *C. elegans* INS peptides are derived from a precursor protein  
43 and we have shown that INS peptides with an associated peptide called the F peptide are  
44 strong activators of the *C. elegans* insulin-like receptor. We also identified several INS peptides  
45 that inhibit the insulin-like receptor and these inhibitory INS peptides may have therapeutic  
46 potential.

## 47 **Introduction**

48 The *C. elegans* insulin/insulin-like growth factor signaling (IIS) pathway has been extensively  
49 studied and the IIS pathway components are evolutionary conserved in metazoans [1]. Insulin-  
50 like (INS) peptides bind to and activate cell surface receptors with intrinsic tyrosine kinase  
51 activity [2,3]. Auto-phosphorylation of the receptors promote the recruitment and activation of  
52 downstream components to initiate their biological effects [4]. Unlike the components in the IIS  
53 pathway signal transduction, INS peptides in *C. elegans* are not well studied. The insulin  
54 superfamily genes are ubiquitous and have been identified in all animals [5,6]. Compared to  
55 human and *Drosophila*, which have ten and eight INS peptides respectively, the *C. elegans*  
56 genome encodes forty INS genes [5,7], suggesting that there may be more functional diversity  
57 among the *C. elegans* INS peptides. Strikingly, there is only one INS receptor, DAF-2/INSR, which  
58 the forty INS peptides are thought to bind as ligands. To date, no single loss of function  
59 mutation can fully recapitulate the phenotypes associated with loss of the *daf-2* insulin  
60 receptor [8]. The lack of loss-of-function phenotypes for many of the INS peptides suggests that

61 some act redundantly in *C. elegans*, and this makes addressing INS functions by knock-out  
62 strategies challenging and limited [8].

63 In mammals (including humans), INS peptides and IIS signaling control glucose levels, hormone  
64 homeostasis and metabolism [9]. In *C. elegans*, IIS signaling controls aging, development,  
65 behavior, dauer formation, as well as fat accumulation [10]. By using dauer formation as a  
66 readout phenotype, only INS-4, 6 and DAF-28 were identified as potential agonists, while INS-1,  
67 17 and 18 were identified as potential antagonists [7,11,12]. Some INS peptides were suggested  
68 to be potential agonists or antagonists based on mRNA expression dynamics between fed and  
69 starved conditions [13] and the INS peptides have been shown to regulate each other  
70 transcriptionally [14]. However, the roles and functions of all forty INS peptides remain unclear.

71 INS peptides are expressed primarily in the nervous system [7]. As such, we individually  
72 overexpressed each of the forty INS peptides in all neurons using a pan-neuronal promoter to  
73 direct gene expression [15]. Overexpression (*oe*) lines were then characterized based on  
74 phenotypes associated with abnormal IIS signaling in *C. elegans*. As an example, in the absence  
75 of food, *C. elegans* can arrest development in the first larval stage (L1 arrest), preventing  
76 further growth and development [16]. The level of INS signaling can shorten or lengthen the life  
77 span of L1 arrested animals. Here, we assayed the contribution of individual INS peptides on  
78 phenotypes associated with IIS signaling that include alterations in L1 arrest life span, Q cell  
79 neuroblast divisions, dauer formation and fat metabolism. Based on these assays, seven INS  
80 peptides (INS-3, 4, 6, 9, 19, 32, DAF-28) were categorized as strong agonists and three INS  
81 peptides (INS-17, 37, 39) were strong antagonists of the DAF-2 INS receptor *in vivo*. Nine INS  
82 peptides (INS-1, 2, 10, 11, 13, 20, 24, 29, 35) were found to be weak agonists and five INS

83 peptides (INS-15, 21, 22, 36, 38) functioned as weak antagonists. Five INS peptides (INS-5, 23,  
84 26, 27, 33) did not exhibit any significant phenotype *in vivo*. Eleven of the forty INS peptides  
85 have diverse roles serving as agonists or antagonists of DAF-2/INSR depending on the  
86 phenotypes scored. The forty INS peptides in *C. elegans* have been grouped into three classes:  
87  $\alpha$ ,  $\beta$  and  $\gamma$  (Figure 7), on the basis of predicted arrangements of their disulfide bonds [7]. Our  
88 work revealed that the  $\beta$  class INS peptides that contain a sequence known as the F peptide is a  
89 strong predictor of an INS with activation properties. The majority of  $\beta$  class INS function as  
90 agonistic ligands of DAF-2/INSR. Our INS overexpression work reveals the functional nature of  
91 signaling for each of the forty INS *in vivo*, and promotes future studies on the functions of the  
92 entire *C. elegans* insulin gene family on aging, development and metabolic diseases.

## 93 **Results**

### 94 **Overexpressed INS affect L1 arrest life span.**

95 In the absence of food, newly hatched *C. elegans* larva (L1 stage) undergo a developmental  
96 quiescence called L1 arrest. Previously, we and others have shown that down regulation of the  
97 IIS pathway is critical for L1 arrest survival [17,18]. Wild type L1 arrested worms live for a  
98 maximum of 20 days with a mean life span of 13 days when grown at 20°C. Manipulation of IIS  
99 signaling can alter the normal 20 day survival period. DAF-18 is the worm orthologue of the  
100 human PTEN tumor suppressor. DAF-18/PTEN functions to inhibit the IIS pathway. Enhanced IIS  
101 caused by the loss of *daf-18* resulted in shortened life span during L1 arrest (Figure 1A).  
102 Blocking IIS by loss of the *daf-2*/INSR resulted in lengthened lifespan in L1 arrested worms  
103 (Figure 1A). To categorize the functional role of INS peptides on the regulation of the IIS

104 pathway, each of the forty *ins (oe)* strains were scored for L1 arrest life span. We found that  
105 twenty-one (*ins-1, 2, 3, 4, 6, 7, 8, 9, 10, 11, 13, 16, 18, 19, 20, 25, 29, 30, 31, 32* and *daf-28*) *ins*  
106 (*oe*) worms had significantly shorter life span when compared to wild type worms during L1  
107 arrest (Figure 1B and C). This suggests that these twenty-one INS peptides function as DAF-  
108 2/INSR agonists to activate the IIS pathway. Eight (*ins-12, 14, 17, 22, 28, 34, 37, and 39*) *ins (oe)*  
109 worms had significantly longer life span than wild type L1 worms (Figure 1D), suggesting that  
110 these INS function as DAF-2/INSR antagonists to shut down IIS. Eleven *ins (oe)* (*ins-5, 15, 21, 23,*  
111 *24, 26, 27, 33, 35, 36* and *38*) strains had normal L1 arrest life span compared to wild type  
112 worms (Supplemental sheet), suggesting that these INS peptides play neutral roles on L1 arrest  
113 life span.

#### 114 **Agonistic INS peptides cause Q cell divisions during L1 arrest.**

115 During L1 arrest all cell divisions are halted due, in part, to the shutdown of the IIS pathway.  
116 When the IIS pathway is activated during L1 arrest, we showed that the Q cell lineage  
117 undergoes cells divisions and movements (in review). We asked whether INS (*oe*) could cause Q  
118 cell divisions during L1 arrest. To aid with the scoring of the Q cell divisions in L1 arrest, we  
119 scored the presence of the Q cell neuroblast descendants AVM and PVM. Normally, L1 arrested  
120 worms only have the embryonic mechanosensory neurons ALMs and PLMs (Figure 2A). Our  
121 previous work found that AVM and PVM were present in L1 arrested *daf-18* mutants (Figure  
122 2B), as loss of *daf-18* enhances insulin signaling. Therefore in L1 arrest, if A/PVM are present it  
123 tells us the Q cell lineage has undergone its terminal divisions and can be used as a new readout  
124 to analyze the functions of the INS ligands.

125 We found that thirteen INS (*oe*) strains (*ins-1, 2, 3, 4, 6, 7, 8, 9, 19, 25, 31, 32* and *daf-28*)  
126 caused Q cell divisions in L1 arrested worms (Figure 2C and D). Our results suggested that these  
127 INS peptides are strong DAF-2 agonists. The Q cell divisions during L1 arrest is an excellent  
128 readout for INS peptides that activate the receptor. However, this phenotype on its own is not  
129 sufficient to determine INS peptides that are inhibitory to DAF-2 as the loss of DAF-2 is the  
130 same as wildtype (i.e. no Q cell divisions during L1 arrest). To examine INS peptides found to be  
131 inhibitory based on L1 arrest life span, we used *daf-18* mutant worms (i.e. increased IIS  
132 signaling) and asked whether the inhibitory INS peptides could suppress the *daf-18* Q L1 arrest  
133 cell divisions. As predicted, we found that all the *ins (oe)* strains which could make L1 arrested  
134 worms live longer (Figure 1D) could also significantly suppress the *daf-18* Q cell divisions (Figure  
135 2E). These results confirm that the eight INS peptides (INS-12, 14, 17, 22, 28, 34, 37, and 39)  
136 function as DAF-2/INSR antagonists in both L1 arrest life span and Q cell divisions. All INS  
137 peptides that could induce L1 arrest Q cell divisions also shortened L1 arrest lifespan. However,  
138 not all the *ins* genes which shorten L1 arrest lifespan can induce L1 arrest Q cell divisions (Figure  
139 1C), suggesting that these INS peptides have specific activities in controlling L1 arrest life span  
140 and cell divisions.

141 To ensure that INS peptides overexpressed in the nervous system were dependent on normal  
142 peptide processing, we tested whether the pro-protein convertase deficient animal (*egl-3*  
143 mutant) [12] could suppress the function of agonistic INS peptides on L1 arrest Q cell divisions.  
144 We found that L1 arrested Q cell divisions in *ins (oe)* worms were completely suppressed by *egl-*  
145 *3*. In addition, if these agonists activate the DAF-2/INSR then *daf-2* mutants should suppress the  
146 *ins (oe)* L1 arrest Q cell divisions. We found that each *ins (oe)* strain that induced L1 arrested Q

147 cell divisions was completely suppressed in the *daf-2(e979)* or *daf-2 (e1370)* mutant  
148 background (data not show). Previous work showed that activated IIS pathway also induced  
149 germ cell and M cell divisions in L1 arrested worms [13,19], therefore we determined whether  
150 these overexpressed INS peptides would enhance germ cell divisions and/or M cell divisions.  
151 Indeed, the overexpressed agonistic INS peptides were able to act cell non-autonomously,  
152 resulting in M cell and germ cell divisions during L1 arrest (Figure 3).

### 153 **INS peptide function on dauer formation.**

154 In *C. elegans*, animals in the second larval stage can enter a dauer diapause phase under  
155 adverse environmental conditions. Mutants that reduced IIS (such as *daf-2 INSR (lf)* or *age-1*  
156 *PI3K (lf)*) have a dauer-constitutive (Daf-c) phenotype. Yet, individual INS knock out mutants  
157 only show a very weak dauer phenotype which may imply functional redundancy [14].  
158 Functional redundancy was supported by creating a fully penetrant Daf-c phenotype by  
159 simultaneous removal of *ins-4*, *ins-6* and *daf-28* (Hung et al. 2014). However, the functions of  
160 the forty *ins* genes on dauer formation are still not well addressed. Here, we tested the function  
161 of individual pan-neuronal INS on dauer formation. Previous work showed that wildtype *C.*  
162 *elegans* can go into dauer under high temperatures even in the presence of food or non-  
163 crowding conditions [20]. At 29°C we found nineteen INS peptides (INS-1, 2, 3, 4, 6, 8, 9, 10, 11,  
164 12, 13, 14, 19, 24, 28, 32, 34, 35 and DAF-28) significantly reduced dauer formation (Figure 4C),  
165 consistent with these INS peptides acting as DAF-2/INSR agonists. Twelve INS peptides (INS-7,  
166 15, 16, 17, 18, 25, 30, 31, 36, 37, 38 and 39) caused higher dauer penetrance than wild type  
167 (Figure 4B), consistent with these INS peptides acting as DAF-2/INSR antagonists. Nine INS  
168 peptides (INS-5, 20, 21, 22, 23, 26, 27, 29 and 33) had no significant functions on dauer



169 formation (Figure 4A). Interestingly, with ten INS peptides (INS-1, 2, 3, 4, 6, 8, 9, 19, 32 and daf-  
170 28) worms showed shortened L1 arrest life span, promoted L1 arrest Q cell divisions and  
171 reduced dauer formation, suggesting that these ten INS can activate DAF-2 function  
172 consistently when scored by different phenotypes. Notably, not all the INS peptides which  
173 extended L1 arrest life span enhanced dauer formation, suggesting that these INS peptides  
174 have different functions to control L1 arrest and dauer. For example, INS-12, 14, 22, 28, and 34  
175 acted like DAF-2/INSR antagonists as they increased L1 life span, while they acted like agonists  
176 or had no function in dauer formation. INS-7, 16, 18, 25, 30 and 31 acted as DAF-2/INSR  
177 agonists as they reduced L1 arrest life span, but acted as DAF-2/INSR antagonists by increasing  
178 dauer formation.

#### 179 **INS peptide function on fat accumulation in adult worms.**

180 The IIS pathway plays an important role in controlling fat accumulation [21,22]. The *daf-2/INSR*  
181 (*lf*) causes fat accumulation in adults [23-25]. Food cues are sensed by an olfactory receptor in  
182 the amphidal sensory neurons and this, in turn, is relayed to the IIS pathway to control fat  
183 metabolism. However, the functions of INS on fat accumulation have not been identified. We  
184 studied the role of each of the forty INS on fat accumulation in adult worms and found that  
185 thirteen INS peptides (INS-3, 4, 6, 9, 11, 16, 18, 19, 25, 29, 30, 32 and DAF-28) had lower fat  
186 levels in comparison to wild type (Figure 5A and C). Seven INS peptides (INS-8, 12, 17, 21, 28, 37  
187 and 39) elevated fat levels compared to wild type worms (Figure 5B). Our results suggest that  
188 most of the INS that act as agonists had reduced fat staining while most of the antagonists had  
189 increased fat staining. Of all the thirteen INS (*oe*) that could induce L1 arrest Q cell divisions

190 (Figure 2D), most behaved as agonists for fat accumulation with the exception of INS-1, 2, 7 and  
191 31 that had no effect, and INS-8 which acted as an antagonist for fat accumulation. Only INS-21  
192 appeared to be specific for a role in fat accumulation exhibiting no effects on the other three  
193 phenotypes scored (Figure 5B).

#### 194 **An F peptide and the $\beta$ class INS act as agonists.**

195 According to our results, it is apparent that INS peptides that were structurally characterized as  
196 the  $\beta$  class and contain a sequence known as the F peptide are activators of the DAF-  
197 2/INSR(Figure 7). Nine of the  $\beta$  class INS peptides contain the F peptide (Figure 7). All of the  $\beta$   
198 class INS behaved as agonists of DAF-2/INSR in our L1 arrest Q cell division assay, except for  
199 INS-10, which does not have an F peptide (Figure 7). We hypothesized that the F peptide  
200 contributes to the *C. elegans* INS activation in L1 arrest Q cell divisions. To test this hypothesis,  
201 we pan-neuronally expressed a strong agonist, INS-4 with a deletion of the F-peptide region or  
202 the F peptide alone and found that both failed to induce Q cell divisions during L1 arrest (Figure  
203 6A and B). Pan-neuronal co-expression of the F peptide and the F peptide-lacking INS-4 resulted  
204 in the induction of Q cell divisions during L1 arrest (Figure 6A and B), showing that the F peptide  
205 can act in trans and is necessary for INS-4 activation of DAF-2/INSR. We then asked if co-  
206 expression of the F peptide with the  $\beta$  class INS-10, whose overexpression does not affect Q cell  
207 division, could induce L1 arrest Q cell divisions. The F peptide and INS-10 co-expression in trans  
208 failed to induce Q cell divisions during L1 arrest (Figure 6B). This suggests that the F peptide  
209 functionally complements INS-4 (minus F peptide) activity in a peptide sequence specific  
210 manner and/or that the pool of F peptides released upon processing of F peptide INS may not  
211 functionally complement INS peptides that lack an embedded F peptide sequence.

## 212 Discussion

213 In this study, we created independent worm lines that overexpressed each of forty *C. elegans*  
214 INS peptides and assayed for IIS phenotypes in order to assign *in vivo* roles. The phenotypes  
215 that we measured in INS overexpression lines were dependent on processing by pro-protein  
216 convertase (EGL-3) in the nervous system. Although expressed in the nervous system, we  
217 showed that processed peptides must be secreted and can act cell non-autonomously on  
218 germline and M cells and is dependent on the DAF-2/INSR. Our study is the first to provide the  
219 functional data for all forty INS on L1 arrest life span, Q cell divisions, heat-stress induced dauer  
220 formation, and fat accumulation. Our results are summarized in Table 1 and Figure 7.

221 Mutants with reduced IIS signaling have both a Daf-c phenotype and extended L1 arrest  
222 survival. We show that the INS-17, 37 and 39 are antagonists of DAF-2/INSR exhibiting  
223 increased L1 arrest survival and increased dauer formation. INS-17 was previously reported to  
224 work as a DAF-2/INSR antagonist for dauer regulation [11], but this work is the first to assign  
225 INS-37 and the 39 as antagonists. Our work also demonstrated that select INS peptides are DAF-  
226 2/INSR antagonists in controlling L1 arrest survival but are pleiotropic in their action in  
227 controlling dauer formation. For example, INS-12, 14, 28 and 34, which act as antagonists and  
228 can extend L1 arrest survival, can also act as agonists and have significantly lower dauer  
229 formation than wild type worms. On the other hand, INS-7, 16, 18, 25, 30, 31, which act as  
230 agonists in L1 arrest, but can have the opposite roles in dauer and act as an antagonist and  
231 increased dauer formation. Our results suggest that INS function in L1 arrested worms may be  
232 different from that of controlling dauer formation since it is an alternative L3 development  
233 stage, and thus INS peptides have spatiotemporal compartmentalization with respect to their

234 function. Our finding is consistent with studies that show that dauer arrest and adult lifespan  
235 regulation by IIS are also decoupled [26-29].

236 Pan-neuronal INS overexpression that caused L1 arrest Q cell divisions identified thirteen INS  
237 peptides (INS-1, 2, 3, 4, 6, 7, 8, 9, 19, 25, 31, 32 and DAF-28) that act as agonists for the DAF-  
238 2/INSR. All thirteen INS peptides also have short L1 arrest life span, suggesting that all thirteen  
239 INS peptides behave as potential DAF-2/INSR agonists. Previous studies, based on differing  
240 assays assigned INS-3, 4, 6, 9, DAF-28 as potential agonist INS peptides [12,13]. These studies  
241 are consistent with our findings and support the reliability of our L1 arrest Q cell division  
242 readout as a means of categorizing the *ins* genes. INS-5 has been suggested to be an agonist  
243 [13], however, we did not find INS-5 to have any function in all of our assays, which is  
244 consistent with another report [12]. INS-1 was shown to be an antagonistic peptide based on  
245 dauer formation [7,12,30]. Overexpression of *ins-1*, enhances dauer arrest in weak *daf-2*  
246 mutants, suggesting that INS-1 antagonize DAF-2 insulin-like signaling. Also, INS-1 is  
247 antagonistic to DAF-2 for behavior [31]. However, in our assays we found INS-1 to have weak  
248 activation properties. INS-1 may be a complex peptide as INS-1 acts as an agonist for DAF-2 in  
249 salt chemotaxis learning [32].

250 We identified eight antagonistic INS peptides that could significantly extend L1 arrest life span  
251 and when overexpressed from the nervous system could suppress the *daf-18/pten* L1 arrest Q  
252 cell divisions. Thus, these INS peptides acted as therapeutic peptides for *daf-18/pten* worms. In  
253 humans, insulin and IGFs are thought to work as agonists and do not have antagonistic  
254 properties. Our work showed that *C. elegans* INS-6 is a strong agonist and INS-6 has been  
255 shown to bind and activate the human insulin receptor [33]. It would be interesting to know

256 whether the antagonistic INS peptides we have identified in this study can bind to and inhibit  
257 the human insulin or IGF-1 receptor, if so, these *C. elegans* INS peptides could be used as future  
258 therapeutics.

259 Our study, revealed that INS-8 behaves as an agonist of DAF-2/INSR, because *ins-8 (oe)*  
260 shortens the lifespan of L1 arrested worms, has low penetrance dauer formation and promotes  
261 L1 arrest Q cell divisions. A previous study suggested that INS-8 may work as an agonist [8].  
262 However, *ins-8 (oe)* worms behaved as an antagonist of DAF-2/INSR exhibiting higher fat  
263 accumulation. One study showed that *ins-8 (oe)* enhances *ins-7* mutant life span, which would  
264 suggest that INS-8 is an antagonist [8]. We suggest that the neuronal *ins-8 (oe)* is sufficient to  
265 work as an agonist to activate the IIS pathway which in turn controls the L1 arrest life span and  
266 dauer formation, but in adult worms, it may work as an antagonist. This result with INS-8 is  
267 consistent with our finding that many INS peptides have distinct roles in mediating fat  
268 accumulation that is developmentally separate from its effects on dauer and L1 arrest life span.  
269 Insulin signaling temporally and in varying tissues of the body contributes differently to fat  
270 content [27].

271 Of the 40 INS peptides tested, eight appear to have specific functions in our phenotype assays.  
272 INS-15, INS-21 and INS-20, 22 act as DAF-2/INSR antagonists specifically for regulating dauer,  
273 fat metabolism, and L1 arrest life span respectively. Similarly, INS-24, 35, 36 and 38 only  
274 function in dauer formation.

275 To understand what makes an INS an activator we focused on the L1 arrest Q cell divisions as  
276 this assay determined with certainty which INS peptides acted as DAF-2/INSR activators. Our  
277 study revealed that the  $\beta$  class INS peptides which contains the three canonical disulfide bonds

278 as well as an additional inter-chain disulfide bond are a good predictor of an INS peptide  
279 agonist. INS-1 to INS-10 and DAF-28 fall into this class (Figure 7). Nine of the  $\beta$  class INS contain  
280 an F peptide [7], the exception is INS-10. The F peptide is processed at the N-terminus by the  
281 signal peptidase cleavage site and at the C- terminus by either the proprotein convertase  
282 enzymes EGL-3/PC2-like with cleavage sequence (RR or KR) or a KPC-1/PC1-like site (R-X-X-R)  
283 [12] (Figure S1). INS-10 does have activation properties and reduces L1 arrest life span and  
284 dauer formation, but could not induce L1 arrest Q cell divisions. INS-5 was predicted to contain  
285 an F peptide [7], but upon further examination, INS-5 does not have a proprotein convertase  
286 site that would release the F peptide, but instead would be incorporated as the B chain (Figure  
287 7, Figure S1). Thus, our results reveal a striking revelation that all INS peptides that are  
288 predicted to contain an F peptide should behave as agonists of the DAF-2/INSR (Figure 7). We  
289 showed that the F peptide is indeed required for INS-4 to induce L1 arrest Q cell divisions and  
290 the F peptide can be added back in trans to restore INS-4 (minus F peptide) function. Note that  
291 the F peptide is not an absolute requirement for an INS to induce L1 arrest Q cell divisions as  
292 INS-1, 19, 25, 31, and 32 could induce L1 arrest Q cell divisions (albeit not as strong as other eg.  
293 INS-4). Interestingly, the predicted signal sequences for INS- 32 was longer than average INS  
294 peptides and therefore may produce an F peptide. This prompted us to look more closely at the  
295 predicted peptides and using the SignalP 4.1 (<http://www.cbs.dtu.dk/services/SignalP/>), we  
296 identified INS-32 as having potential F peptide (Figure S1). In addition, we also propose that  
297 INS-19 has an F peptide as it has a potential pro-protein convertase cleavage site (Figure S1).  
298 Human insulin has a C peptide, and human IGF-1 and IGF-2 have E peptides that are cleaved  
299 during processing analogous to the F peptides identified in *C. elegans* INS peptides. Our work

300 on the F peptide should stimulate closer examination of peptides released upon processing of  
301 human Insulin and IGF. For instance, IGF-1 is one of the key molecules in cancer biology,  
302 however little is known about the role of the E peptide. E peptide is thought to have functional  
303 properties as the release from IGF-1 thought to induce cellular proliferation in the human  
304 prostate cancer [34]. The C peptide of proinsulin is important in processing of mature insulin  
305 and may have biological activity as a report suggests that it binds to a G protein-coupled surface  
306 receptor and activates Ca (2+)-dependent intracellular signaling pathways [35]. Since we have  
307 provided evidence in *C. elegans* that the F peptide can work in trans with the INS-4 lacking an F  
308 peptide, the F peptide serves as a modulator of INS-4 to induce L1 arrest Q cell divisions.

309 Finally, of the 40 INS (*oe*) strains tested, INS-5, 23, 26, 27, 33 were not functional in the selected  
310 assays. These INS peptides may have specific roles that have not been uncovered through the  
311 assays selected. The INS peptides are also thought to function in a combinatorial fashion and  
312 perhaps these single INS peptides have no function on their own and may participate with the  
313 other INS to exert their function [14]. Alternatively, these INS may bind to receptors other than  
314 DAF-2/INSR. A report has suggested that additional insulin-like receptors have been identified  
315 in the *C. elegans* genome [36].

316 In conclusion, our work systematically tested the functions of each of forty INS on dauer  
317 formation, L1 arrest life span, L1 arrest Q cell divisions and fat accumulation phenotypes (Table  
318 1). By using these IIS phenotypes as readouts of insulin peptide activity, we found that seven  
319 INS peptides (3, 4, 6, 9, 19, 32 and DAF-28) were strong agonists and three INS peptides (17, 37  
320 and 39) were strong antagonists of DAF-2/INSR, because these INS peptides acted either as  
321 agonists or antagonists in all our tested phenotypes. Five INS peptides (15, 21, 22, 36, and 38)

322 were found to be weak antagonists; and nine INS peptides (1, 2, 10, 11, 13, 20, 24, 29 and 35)  
323 were weak agonists. Five INS peptides (5, 23, 26, 27 and 33) were neutral ligands. Eleven INS  
324 peptides (INS-7, 8, 12, 14, 16, 18, 25, 28, 30, 31 and 34) have different roles in different stress  
325 environments and developmental stages (Table 1 and Figure 7). These diverse functions of INS  
326 may contribute to important influences on development, metabolism, and aging-related  
327 diseases.

## 328 **Methods**

### 329 *Strains*

330 Most of the strains used in this study were acquired from the *Caenorhabditis* Genetics Center  
331 (CGC). Standard culture methods were used as previously described [37]. Strains were grown  
332 on OP50 *E. coli* and cultured at 20°C unless otherwise indicated. Strains used in this study:  
333 CZ10175: *zdIs5 [mec-4p::GFP + lin-15(+)] I*, RB712: *daf-18(ok480)*, CB1370: *daf-2 (e1370)*,  
334 DR1942: *daf-2(e979)*, VC671: *egl-3 (ok979)*. PD4666: *ayIs6 [Phlh-8::gfp + dpy-20(+)]*.

### 335 *Transgenic strains*

336 For the *ins* overexpression strains, the insulin genomic sequences were amplified from a N2  
337 genomic DNA and were placed under control of the pan neuronal promoter *Prgef-1* by standard  
338 cloning procedures [15]. A plasmid with the injection marker *odr-1::rfp* was injected into *Pmec-*  
339 *4::GFP(zdIs5)* [38] worms using standard microinjection methods [39]. For the F peptide  
340 experiment: Q5 mutagenesis (NEB) using primers was used to delete the F-peptide sequence  
341 from the *Prgef-1::INS-4* plasmid. Each injected strain had at least 2 stable lines.



342 *L1 arrest Q Cell divisions*

343 Non-starved well-maintained mix staged worms were collected to prepare embryos, as  
344 described [40]. In brief, embryos were maintained and hatched in sterile M9 and incubated at  
345 20°C with low speed rocking to initiate L1 arrest. The final Q cell descendants (A/PVM) were  
346 observed under an Axioplan fluorescent microscope (Zeiss, Germany) after 2 days or more in L1  
347 arrest. 50-100 µL of M9 containing greater than 50 L1 arrested worms were removed from the  
348 culture. The total number of worms and the worms with A/PVM cells divisions were counted.  
349 For transgenic strains, only the worms with the injection marker were counted and analyzed.  
350 Similarly, M cell divisions were analyzed by using *ayIs6* strains [41].

351 *Antibody staining*

352 Antibody staining was performed as previously described (Chin-Sang et al. 1999). To detect  
353 germline cells, rabbit anti-PGL-1 (P-granule component) (1:20000) (a gift from Dr. Susan  
354 Strome) was used as the primary antibody. Detection was with a FITC-labeled goat anti-rabbit  
355 secondary antibody (1:100). For transgenic strains, only the worms with the injection marker  
356 were counted and analyzed. The total number of worms and the worms with germ-cell divisions  
357 were counted. Analysis of worms was using an Axioplan fluorescent microscope (Zeiss,  
358 Germany).

359 *L1 arrest life span assays*

360 Life span was assessed in liquid medium [18]. L1 worms were cultured in 1 mL M9, 50-100 µL  
361 was taken to ensure the sample size was larger than 50, and the worms were scored every day.

362 We scored survival by counting the number of worms that were moving (alive) and then  
363 dividing that number by the total number of worms in the aliquot. To compare the survival  
364 rates between strains, the L1 arrests were carried out in triplicate with at least 100 L1s and the  
365 mean survival rate calculated by the Kaplan-Meier method [42], that is the fraction of living  
366 animals over a time course. The significance of difference in overall survival rate is performed  
367 using the log-rank test [43].

#### 368 *Fat staining*

369 Synchronized eggs were cultured on OP50 plates with 25 ng/ml of Nile red for 3 days at 20°C,  
370 and then washed 3 times with M9, cultured on normal OP50 plates for 1 more day at 20°C to  
371 eliminate the Nile red OP50 background in the intestine. Worms were collected and washed in  
372 M9 3 times, then fixed in 40% isopropanol for 3 min. At least 30 animals were imaged in at least  
373 three separate experiments using a Zeiss Axioplan. The fluorescent intensity in the whole worm  
374 was quantified by using ImageJ.

#### 375 *Dauer formation at high temperature*

376 We analyzed L2 dauer formation at 29°C as synchronized *zdis5* worm eggs hatched at 29°C  
377 presented a higher percentage dauer phenotype. The dauer, dauer-like and adult worms with  
378 injection marker were counted. The dauer percentages were calculated. Three independent  
379 trails were performed for each strain, each sample size was greater than 50.

#### 380 **Acknowledgments**

381 We are grateful to *Caenorhabditis* Genomic Center for providing strains, which is funded by the  
382 NIH Office of Research Infrastructure Programs (P40OD010440). The work is supported by  
383 grants from the Natural Sciences and Engineering Research Council of Canada (NSERC 249779)  
384 and the Canadian Institutes of Health Research (CIHR 130541).

385

386 **Figure Legends:**

387 Figure 1. *ins (oe)* functions on L1 arrest life span. (A) *daf-18/pten* mutants have shorter L1 arrest  
388 life span and the insulin receptor *daf-2* mutants have a longer L1 arrest life span than wild type  
389 worms. (B, C) 21 *ins (oe)* strains have shorter L1 life span, suggesting these INS are DAF-2  
390 agonists. (D) 8 *ins (oe)* strains have longer L1 life span, suggesting these INS peptides are DAF-2  
391 antagonists. Also see details in Supplemental sheet.

392 Figure 2. *ins (oe)* functions on L1 arrest Q cell divisions. (A) Wild type worms stop development  
393 at L1 arrest. The wild type worms with touch neuron marker (*zdl5*) only have embryonic ALMs  
394 and PLMs. (B) *daf-18 (-)* L1 arrest mutants have two terminal Q cell descendants AVM and PVM.  
395 (C) A representative *ins-3 (oe)*. The red fluorescence is the AWC neuron from *odr-1::rfp*  
396 transgenic marker for *ins (oe)* lines. (D) 13 *ins (oe)* strains show L1 arrest Q cell divisions,  
397 suggesting these are DAF-2 agonists. (D) 8 *ins (oe)* antagonists which have longer L1 arrest life  
398 span (Figure 1D) can suppress the L1 arrest Q cell divisions in *daf-18 (-)* mutants, suggesting  
399 these INS are DAF-2 antagonists for Q cell divisions. Scale bars represent 50  $\mu$ m. Error bars  
400 represent the SD. \*\*\* P value vs control <0.001. Also see details in Supplemental sheet.

401 Figure 3. Pan-neuronal INS overexpression acts cell non-autonomously to induce non neuronal  
402 cell divisions during L1 arrest. (A) L1 arrest wild-type, only one M cell is observed (*ayIs6*). (B, C,  
403 D) *daf-18 (-)* and Pan-neuronal INS overexpression cause the M cell to divide in L1 arrest. (E, F)  
404 Germ cells (Z2/Z3) in L1 arrested worms. *daf-18(-)* mutants and Pan-neuronal INS  
405 overexpression induces germ cell divisions. Red florescence in the head is the (*odr-1::rfp*):  
406 transgenic marker. Data represents the average of at least 3 independent experiments from at  
407 least two stable transgenic lines. Scale bars represent 50  $\mu$ m. Error bars represent the SD. \*\*\* P  
408 value vs control <0.001.

409 Figure 4. *ins (oe)* strains on dauer formation at high temperature. (A) 9 *ins (oe)* worms have no  
410 significant functions on dauer formation. (B) 12 *ins (oe)* worms (antagonists) induce more dauer  
411 than wild type worms. (C) 19 *ins (oe)* worms (agonists) have less dauer than wild type worms.  
412 Error bars represent the SD, \* P value vs control <0.05, \*\* P value vs control <0.01 \*\*\* P value  
413 vs control <0.001. Also see details in Supplemental sheet.

414 Figure 5. *ins (oe)* functions on fat accumulation. (A) Fat accumulation analyzed by Nile red  
415 staining in wild type, *daf-18(-)*, *daf-2 (-)*, and *ins (oe)* worms. The *daf-2* and *daf-18* mutants have  
416 higher and lower level fat accumulation than wild type respectively. (B) 7 *ins (oe)* worms  
417 (antagonists) have higher fat accumulation than wild type. (C) 13 *ins (oe)* worms (agonists) have  
418 lower fat accumulation than wild type. Error bars represent the SD, \* P value vs control <0.05,  
419 \*\* P value vs control <0.01 \*\*\* P value vs control <0.001. Also see details in Supplemental  
420 sheet.

421 Figure 6. The F peptide is needed for INS-4 activation. (A) Variant of INS-4, a: wildtype *ins-4*  
422 [INS-4(wt)] b: *ins-4* F peptide only [INS-4(F)], c: *ins-4* with F peptide deleted [INS-4(-F)]. (B) INS-4  
423 with no F peptide (c) or F peptide alone (b) does not induce L1 arrest Q cell divisions. However,  
424 adding back both in trans (b+c) can induce L1 arrest Q cell divisions. INS-10 has a structure  
425 similar to INS-4 ( $\beta$  class), but INS-10 has no F peptide. INS-10 + F peptide from INS-4 (b) co-  
426 injection does not induce L1 arrest Q cells divisions.

427 Figure 7. Insulin-like peptides in *C. elegans*. (A) All INS contain at least a signal peptide, B chain  
428 and C chain. Only INS-1 and INS-18 have a C peptide, like human insulin. F peptide is present in  
429 INS-2 through INS-9 and DAF-28. Predicated cleavage sites for the proteolytic processing  
430 (triangles). (B) *C. elegans* INS can be classified into three types based on disulfide bonds (PIERCE  
431 et al. 2001). Gamma insulins have the arrangement of three disulfide bonds as found in  
432 vertebrates while Alpha and Beta insulins contain an additional intra-chain disulfide bond (red).  
433 Alpha insulins lack the common intra-chain bond in the A chain, which is substituted by the  
434 interaction of aromatic amino acid side chains. INS-31 constitutes its own additional class with  
435 three repeats of B and A peptide chains. In our study we classified the 40 insulin ligands into 6  
436 functional groups: strong agonist/antagonist: activity consistence within all tested phenotypes;  
437 weak agonist/antagonist: activity consistence within most tested phenotypes, but have no  
438 significant activity in other phenotypes; diverse: can have both agonist and antagonistic roles  
439 and neutral ligands: no significant activity in all tested IIS assays.

440

441

442 **Supporting Information Legends:**

443 **File: S1\_Peptide sequences and Strain names**

444 Figure S1: Predicted peptides of the *C. elegans* Insulin Like Peptides (INS)

445 Predicted and revised peptide sequences of the 40 *C. elegans* INS. The signal sequence peptide,

446 B peptide, A peptide, C peptide and F peptide are colour coded as indicated. INS-19 and INS-32

447 are revised based on our work.

448 Table S1. INS strains

449 INS overexpressing strains used in this study. Strain names and alleles are indicated.

450 **File: S2\_raw data**

451 An Excel workbook with the raw data for the 4 phenotypes scored in this study.

452

453

454

455

456

457 **Reference**

458 1. Pinero Gonzalez J, Carrillo Farnes O, Vasconcelos AT, Gonzalez Perez A (2009) Conservation of key  
459 members in the course of the evolution of the insulin signaling pathway. *Biosystems* 95: 7-16.

460 2. Ullrich A, Bell JR, Chen EY, Herrera R, Petruzzelli LM, et al. (1985) Human insulin receptor and its  
461 relationship to the tyrosine kinase family of oncogenes. *Nature* 313: 756-761.

- 462 3. Ullrich A, Gray A, Tam AW, Yangfeng T, Tsubokawa M, et al. (1986) Insulin-Like Growth Factor-I  
463 Receptor Primary Structure - Comparison with Insulin-Receptor Suggests Structural  
464 Determinants That Define Functional Specificity. *Embo Journal* 5: 2503-2512.
- 465 4. Taniguchi CM, Emanuelli B, Kahn CR (2006) Critical nodes in signalling pathways: insights into insulin  
466 action. *Nat Rev Mol Cell Biol* 7: 85-96.
- 467 5. Duret L, Guex N, Peitsch MC, Bairoch A (1998) New insulin-like proteins with atypical disulfide bond  
468 pattern characterized in *Caenorhabditis elegans* by comparative sequence analysis and  
469 homology modeling. *Genome Res* 8: 348-353.
- 470 6. Kawano T, Ito Y, Ishiguro M, Takuwa K, Nakajima T, et al. (2000) Molecular cloning and  
471 characterization of a new insulin/IGF-like peptide of the nematode *Caenorhabditis elegans*.  
472 *Biochem Biophys Res Commun* 273: 431-436.
- 473 7. Pierce SB, Costa M, Wisotzkey R, Devadhar S, Homburger SA, et al. (2001) Regulation of DAF-2  
474 receptor signaling by human insulin and ins-1, a member of the unusually large and diverse *C.*  
475 *elegans* insulin gene family. *Genes Dev* 15: 672-686.
- 476 8. Ritter AD, Shen Y, Fuxman Bass J, Jeyaraj S, Deplancke B, et al. (2013) Complex expression dynamics  
477 and robustness in *C. elegans* insulin networks. *Genome Res* 23: 954-965.
- 478 9. Anisimov VN, Bartke A (2013) The key role of growth hormone-insulin-IGF-1 signaling in aging and  
479 cancer. *Crit Rev Oncol Hematol* 87: 201-223.
- 480 10. Murphy CT, Hu PJ (2013) Insulin/insulin-like growth factor signaling in *C. elegans*. *WormBook*: 1-43.
- 481 11. Matsunaga Y, Nakajima K, Gengyo-Ando K, Mitani S, Iwasaki T, et al. (2012) A *Caenorhabditis elegans*  
482 Insulin-Like Peptide, INS-17: Its Physiological Function and Expression Pattern. *Bioscience,*  
483 *Biotechnology, and Biochemistry* 76: 2168-2172.
- 484 12. Hung WL, Wang Y, Chitturi J, Zhen M (2014) A *Caenorhabditis elegans* developmental decision  
485 requires insulin signaling-mediated neuron-intestine communication. *Development* 141: 1767-  
486 1779.
- 487 13. Chen Y, Baugh LR (2014) *Ins-4* and *daf-28* function redundantly to regulate *C. elegans* L1 arrest. *Dev*  
488 *Biol* 394: 314-326.
- 489 14. Fernandes de Abreu DA, Caballero A, Fardel P, Stroustrup N, Chen Z, et al. (2014) An insulin-to-  
490 insulin regulatory network orchestrates phenotypic specificity in development and physiology.  
491 *PLoS Genet* 10: e1004225.
- 492 15. Altun-Gultekin Z, Andachi Y, Tsalik EL, Pilgrim D, Kohara Y, et al. (2001) A regulatory cascade of three  
493 homeobox genes, *ceh-10*, *ttx-3* and *ceh-23*, controls cell fate specification of a defined  
494 interneuron class in *C. elegans*. *Development* 128: 1951-1969.
- 495 16. Baugh LR (2013) To grow or not to grow: nutritional control of development during *Caenorhabditis*  
496 *elegans* L1 arrest. *Genetics* 194: 539-555.
- 497 17. Fukuyama M, Sakuma K, Park R, Kasuga H, Nagaya R, et al. (2012) *C. elegans* AMPKs promote survival  
498 and arrest germline development during nutrient stress. *Biol Open* 1: 929-936.
- 499 18. Zheng S, Chin-Sang ID (2016) *C. elegans* Methods to Study PTEN. *Methods in Molecular Biology*: 307-  
500 321.
- 501 19. Fukuyama M, Rougvie AE, Rothman JH (2006) *C. elegans* DAF-18/PTEN mediates nutrient-dependent  
502 arrest of cell cycle and growth in the germline. *Curr Biol* 16: 773-779.
- 503 20. Ailion M, Thomas JH (2003) Isolation and characterization of high-temperature-induced Dauer  
504 formation mutants in *Caenorhabditis elegans*. *Genetics* 165: 127-144.
- 505 21. Hou NS, Taubert S (2012) Function and Regulation of Lipid Biology in *Caenorhabditis elegans* Aging.  
506 *Front Physiol* 3: 143.
- 507 22. Jones KT, Ashrafi K (2009) *Caenorhabditis elegans* as an emerging model for studying the basic  
508 biology of obesity. *Dis Model Mech* 2: 224-229.

- 509 23. Horikawa M, Sakamoto K (2010) Polyunsaturated fatty acids are involved in regulatory mechanism of  
510 fatty acid homeostasis via daf-2/insulin signaling in *Caenorhabditis elegans*. *Mol Cell Endocrinol*  
511 323: 183-192.
- 512 24. Ashrafi K, Chang FY, Watts JL, Fraser AG, Kamath RS, et al. (2003) Genome-wide RNAi analysis of  
513 *Caenorhabditis elegans* fat regulatory genes. *Nature* 421: 268-272.
- 514 25. Ogg S, Ruvkun G (1998) The *C. elegans* PTEN homolog, DAF-18, acts in the insulin receptor-like  
515 metabolic signaling pathway. *Mol Cell* 2: 887-893.
- 516 26. Apfeld J, Kenyon C (1998) Cell nonautonomy of *C. elegans* daf-2 function in the regulation of  
517 diapause and life span. *Cell* 95: 199-210.
- 518 27. Wolkow CA, Kimura KD, Lee MS, Ruvkun G (2000) Regulation of *C. elegans* life-span by insulinlike  
519 signaling in the nervous system. *Science* 290: 147-150.
- 520 28. Libina N, Berman JR, Kenyon C (2003) Tissue-specific activities of *C. elegans* DAF-16 in the regulation  
521 of lifespan. *Cell* 115: 489-502.
- 522 29. Dillin A, Crawford DK, Kenyon C (2002) Timing requirements for insulin/IGF-1 signaling in *C. elegans*.  
523 *Science* 298: 830-834.
- 524 30. Cornils A, Gloeck M, Chen Z, Zhang Y, Alcedo J (2011) Specific insulin-like peptides encode sensory  
525 information to regulate distinct developmental processes. *Development* 138: 1183-1193.
- 526 31. Kodama E, Kuhara A, Mohri-Shiomi A, Kimura KD, Okumura M, et al. (2006) Insulin-like signaling and  
527 the neural circuit for integrative behavior in *C. elegans*. *Genes Dev* 20: 2955-2960.
- 528 32. Tomioka M, Adachi T, Suzuki H, Kunitomo H, Schafer WR, et al. (2006) The insulin/PI 3-kinase  
529 pathway regulates salt chemotaxis learning in *Caenorhabditis elegans*. *Neuron* 51: 613-625.
- 530 33. Hua QX, Nakagawa SH, Wilken J, Ramos RR, Jia W, et al. (2003) A divergent INS protein in  
531 *Caenorhabditis elegans* structurally resembles human insulin and activates the human insulin  
532 receptor. *Genes Dev* 17: 826-831.
- 533 34. Armakolas A, Kaparelou M, Dimakakos A, Papageorgiou E, Armakolas N, et al. (2015) Oncogenic Role  
534 of the Ec Peptide of the IGF-1Ec Isoform in Prostate Cancer. *Mol Med* 21: 167-179.
- 535 35. Wahren J, Ekberg K, Johansson J, Henriksson M, Pramanik A, et al. (2000) Role of C-peptide in human  
536 physiology. *Am J Physiol Endocrinol Metab* 278: E759-768.
- 537 36. Dlakic M (2002) A new family of putative insulin receptor-like proteins in *C. elegans*. *Curr Biol* 12:  
538 R155-157.
- 539 37. Brenner S (1974) The genetics of *Caenorhabditis elegans*.
- 540 38. Clark SG (2003) *C. elegans* ZAG-1, a Zn-finger-homeodomain protein, regulates axonal development  
541 and neuronal differentiation. *Development* 130: 3781-3794.
- 542 39. Mello CC, Kramer JM, Stinchcomb D, Ambros V (1991) Efficient gene transfer in *C. elegans*:  
543 extrachromosomal maintenance and integration of transforming sequences. *EMBO J* 10: 3959-  
544 3970.
- 545 40. Fukuyama M, Kontani K, Katada T, Rougvie AE (2015) The *C. elegans* Hypodermis Couples Progenitor  
546 Cell Quiescence to the Dietary State. *Curr Biol* 25: 1241-1248.
- 547 41. Kaplan RE, Chen Y, Moore BT, Jordan JM, Maxwell CS, et al. (2015) dbl-1/TGF-beta and daf-12/NHR  
548 Signaling Mediate Cell-Nonautonomous Effects of daf-16/FOXO on Starvation-Induced  
549 Developmental Arrest. *PLoS Genet* 11: e1005731.
- 550 42. Rich JT, Neely JG, Paniello RC, Voelker CC, Nussenbaum B, et al. (2010) A practical guide to  
551 understanding Kaplan-Meier curves. *Otolaryngol Head Neck Surg* 143: 331-336.
- 552 43. Evason K, Huang C, Yamben I, Covey DF, Kornfeld K (2005) Anticonvulsant medications extend worm  
553 life-span. *Science* 307: 258-262.

554



555 **Table 1. *C. elegans* INS peptides function data summary.**

| <i>ins</i> | L1 arrest<br>life span | L1 Q cell<br>divisions | Dauer formation | Fat accumulation |
|------------|------------------------|------------------------|-----------------|------------------|
| 1          | short                  | +                      | L               | N                |
| 2          | short                  | +                      | L               | N                |
| 3          | short                  | +                      | L               | L                |
| 4          | short                  | +                      | L               | L                |
| 5          | normal                 | -                      | N               | N                |
| 6          | short                  | +                      | L               | L                |
| 7          | short                  | +                      | H               | N                |
| 8          | short                  | +                      | L               | H                |
| 9          | short                  | +                      | L               | L                |
| 10         | short                  | -                      | L               | N                |
| 11         | short                  | -                      | L               | L                |
| 12         | long                   | -                      | L               | H                |
| 13         | short                  | -                      | L               | N                |
| 14         | long                   | -                      | L               | N                |
| 15         | normal                 | -                      | H               | N                |
| 16         | short                  | -                      | H               | L                |
| 17         | long                   | -                      | H               | H                |
| 18         | short                  | -                      | H               | L                |
| 19         | short                  | +                      | L               | L                |
| 20         | short                  | -                      | N               | N                |
| 21         | normal                 | -                      | N               | H                |
| 22         | long                   | -                      | N               | N                |
| 23         | normal                 | -                      | N               | N                |
| 24         | normal                 | -                      | L               | N                |
| 25         | short                  | +                      | H               | L                |
| 26         | normal                 | -                      | N               | N                |
| 27         | normal                 | -                      | N               | N                |
| 28         | long                   | -                      | L               | H                |
| 29         | short                  | -                      | N               | L                |
| 30         | short                  | -                      | H               | L                |
| 31         | short                  | +                      | H               | N                |
| 32         | short                  | +                      | L               | L                |
| 33         | normal                 | -                      | N               | N                |
| 34         | long                   | -                      | L               | N                |
| 35         | normal                 | -                      | L               | N                |
| 36         | normal                 | -                      | H               | N                |
| 37         | long                   | -                      | H               | H                |
| 38         | normal                 | -                      | H               | N                |
| 39         | long                   | -                      | H               | H                |
| daf-28     | short                  | +                      | L               | L                |

556

557 Data are compared to wild type. +/-: with/without L1 arrest Q cell divisions. N: normal; L: low;  
558 H; high. See details in Supplemental sheet for raw data. Colour code: Strong agonist, Weak  
559 agonist, Strong antagonist, Weak antagonist, Diverse, Neutral.

560

561

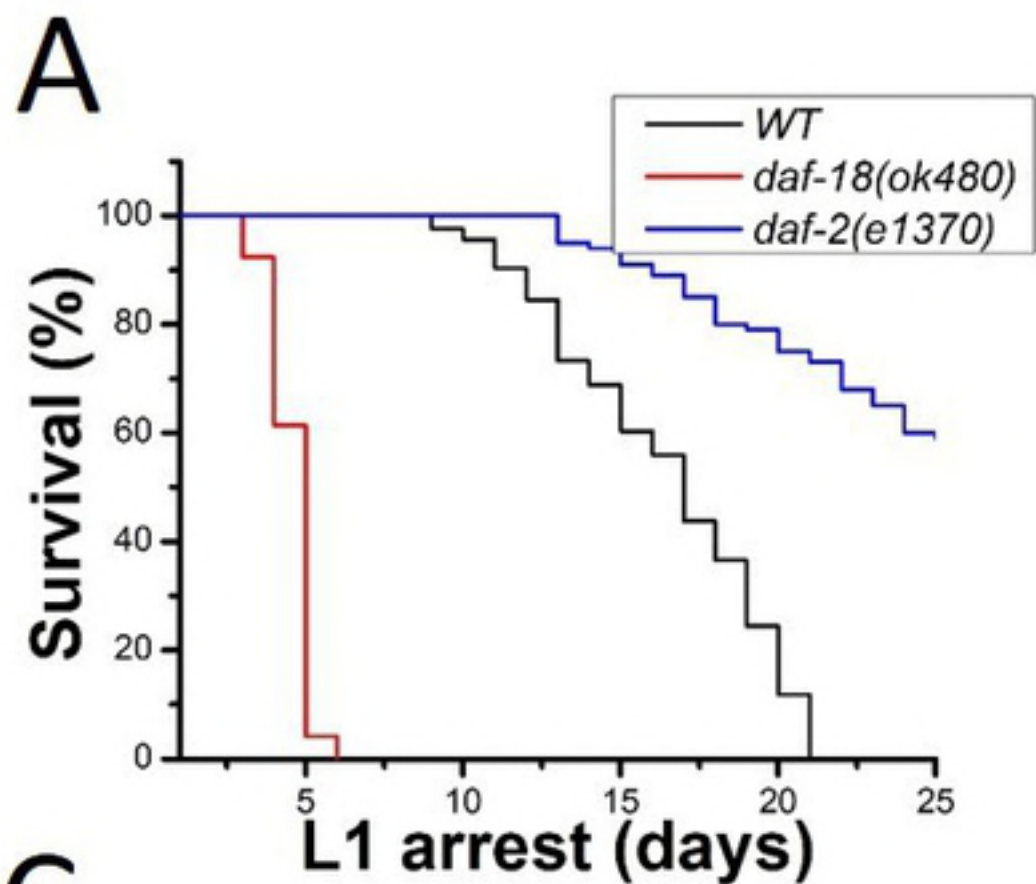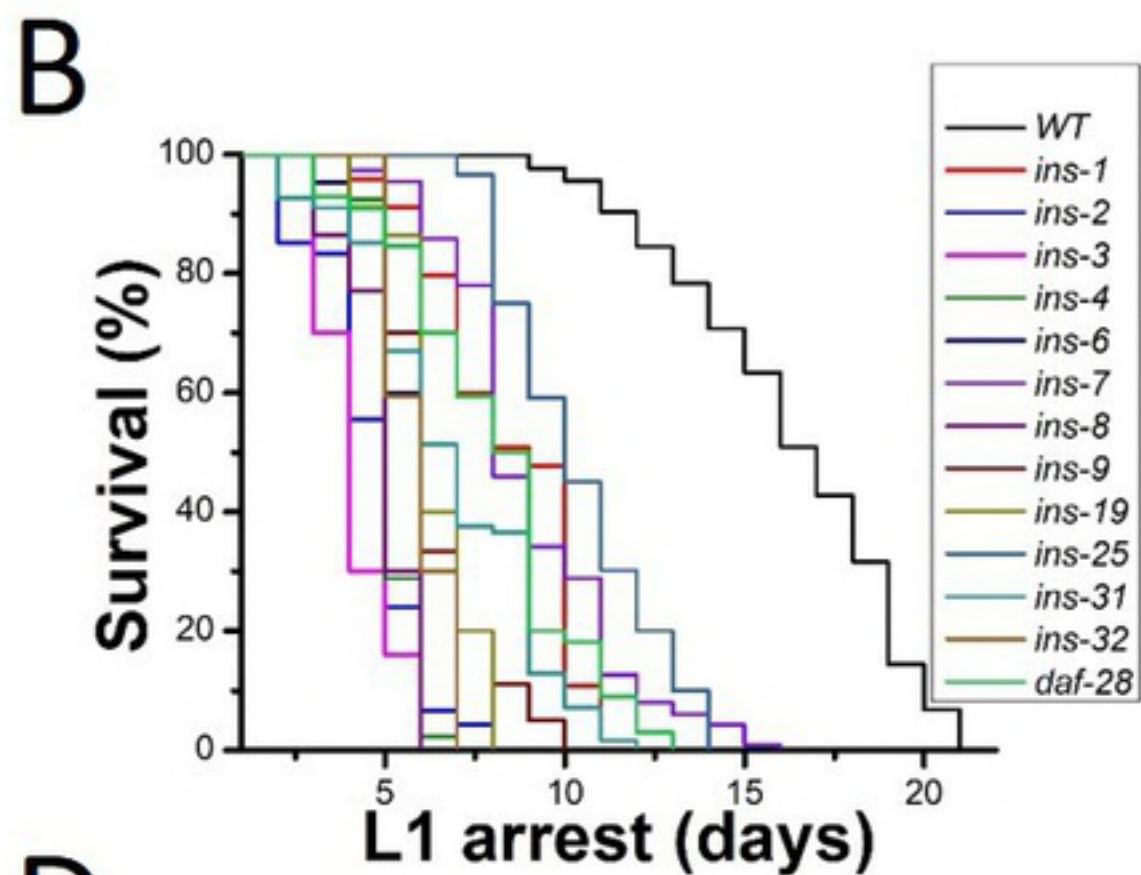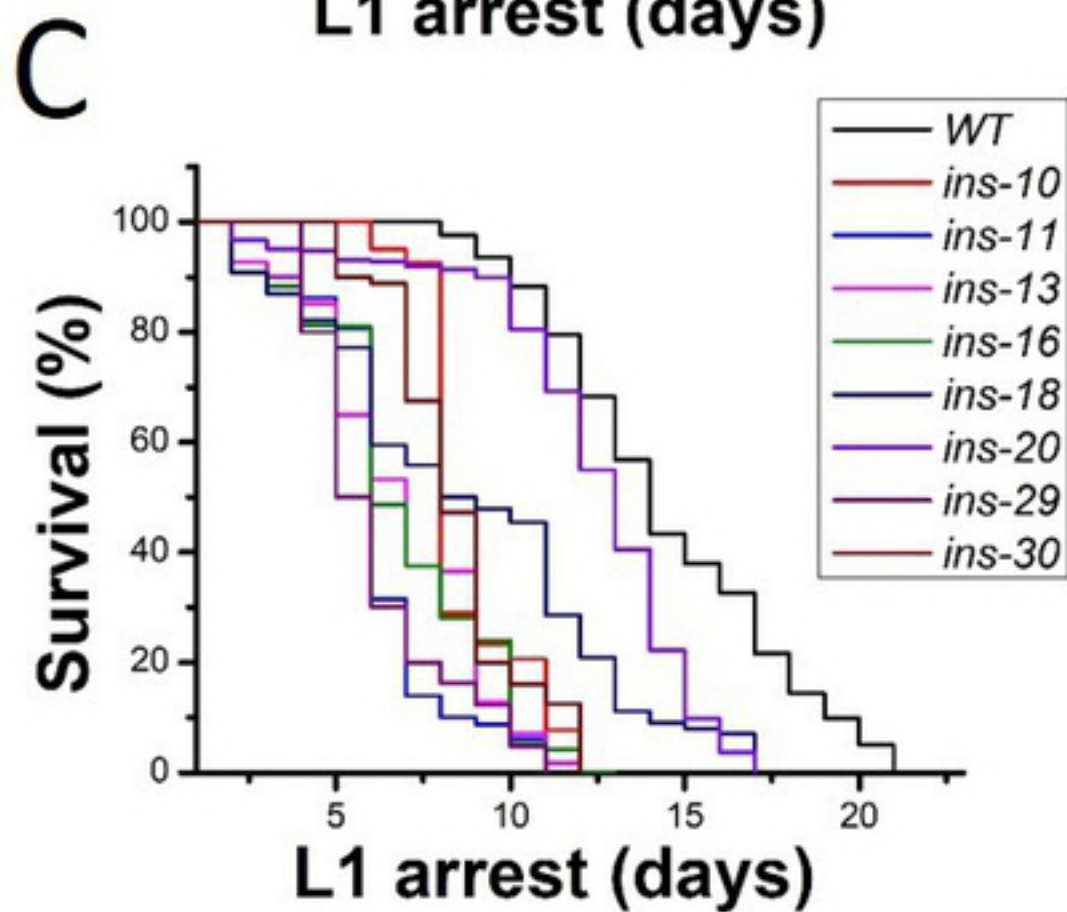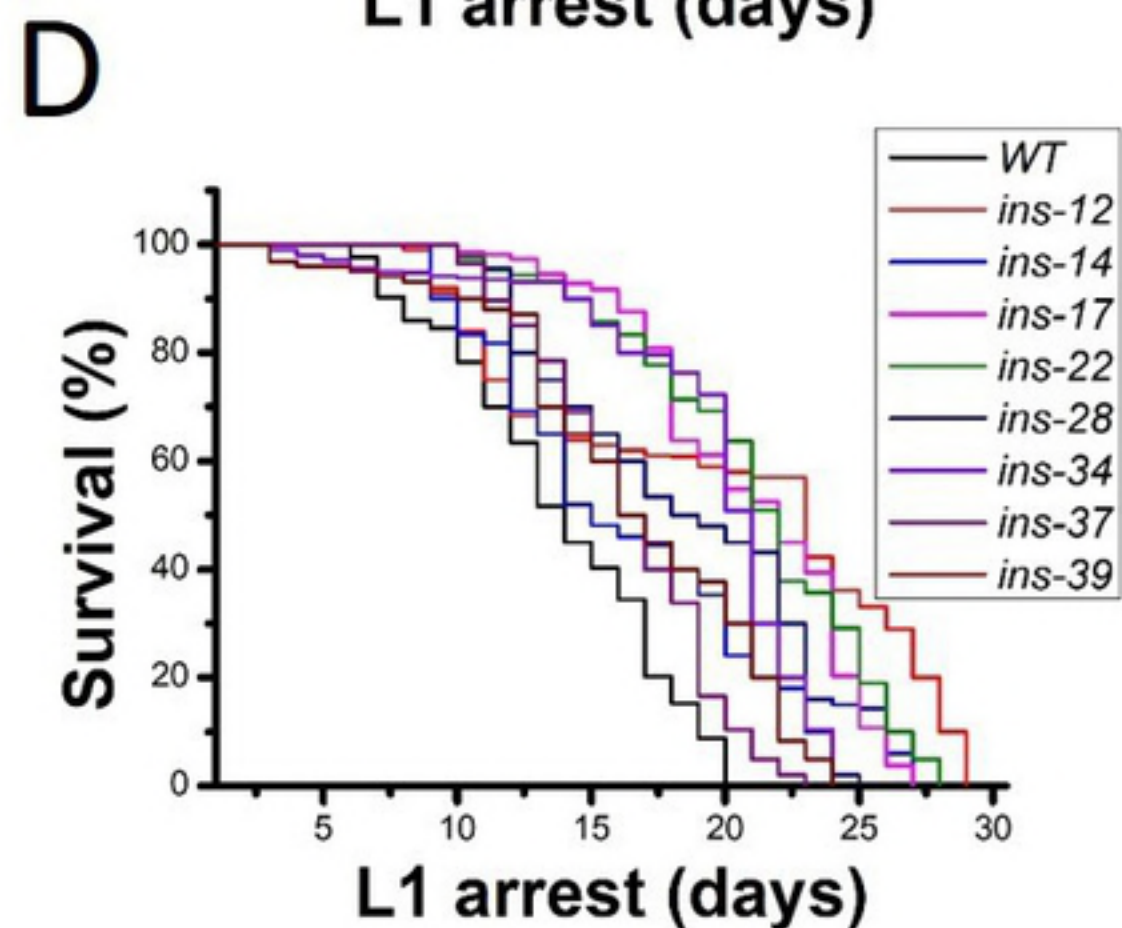

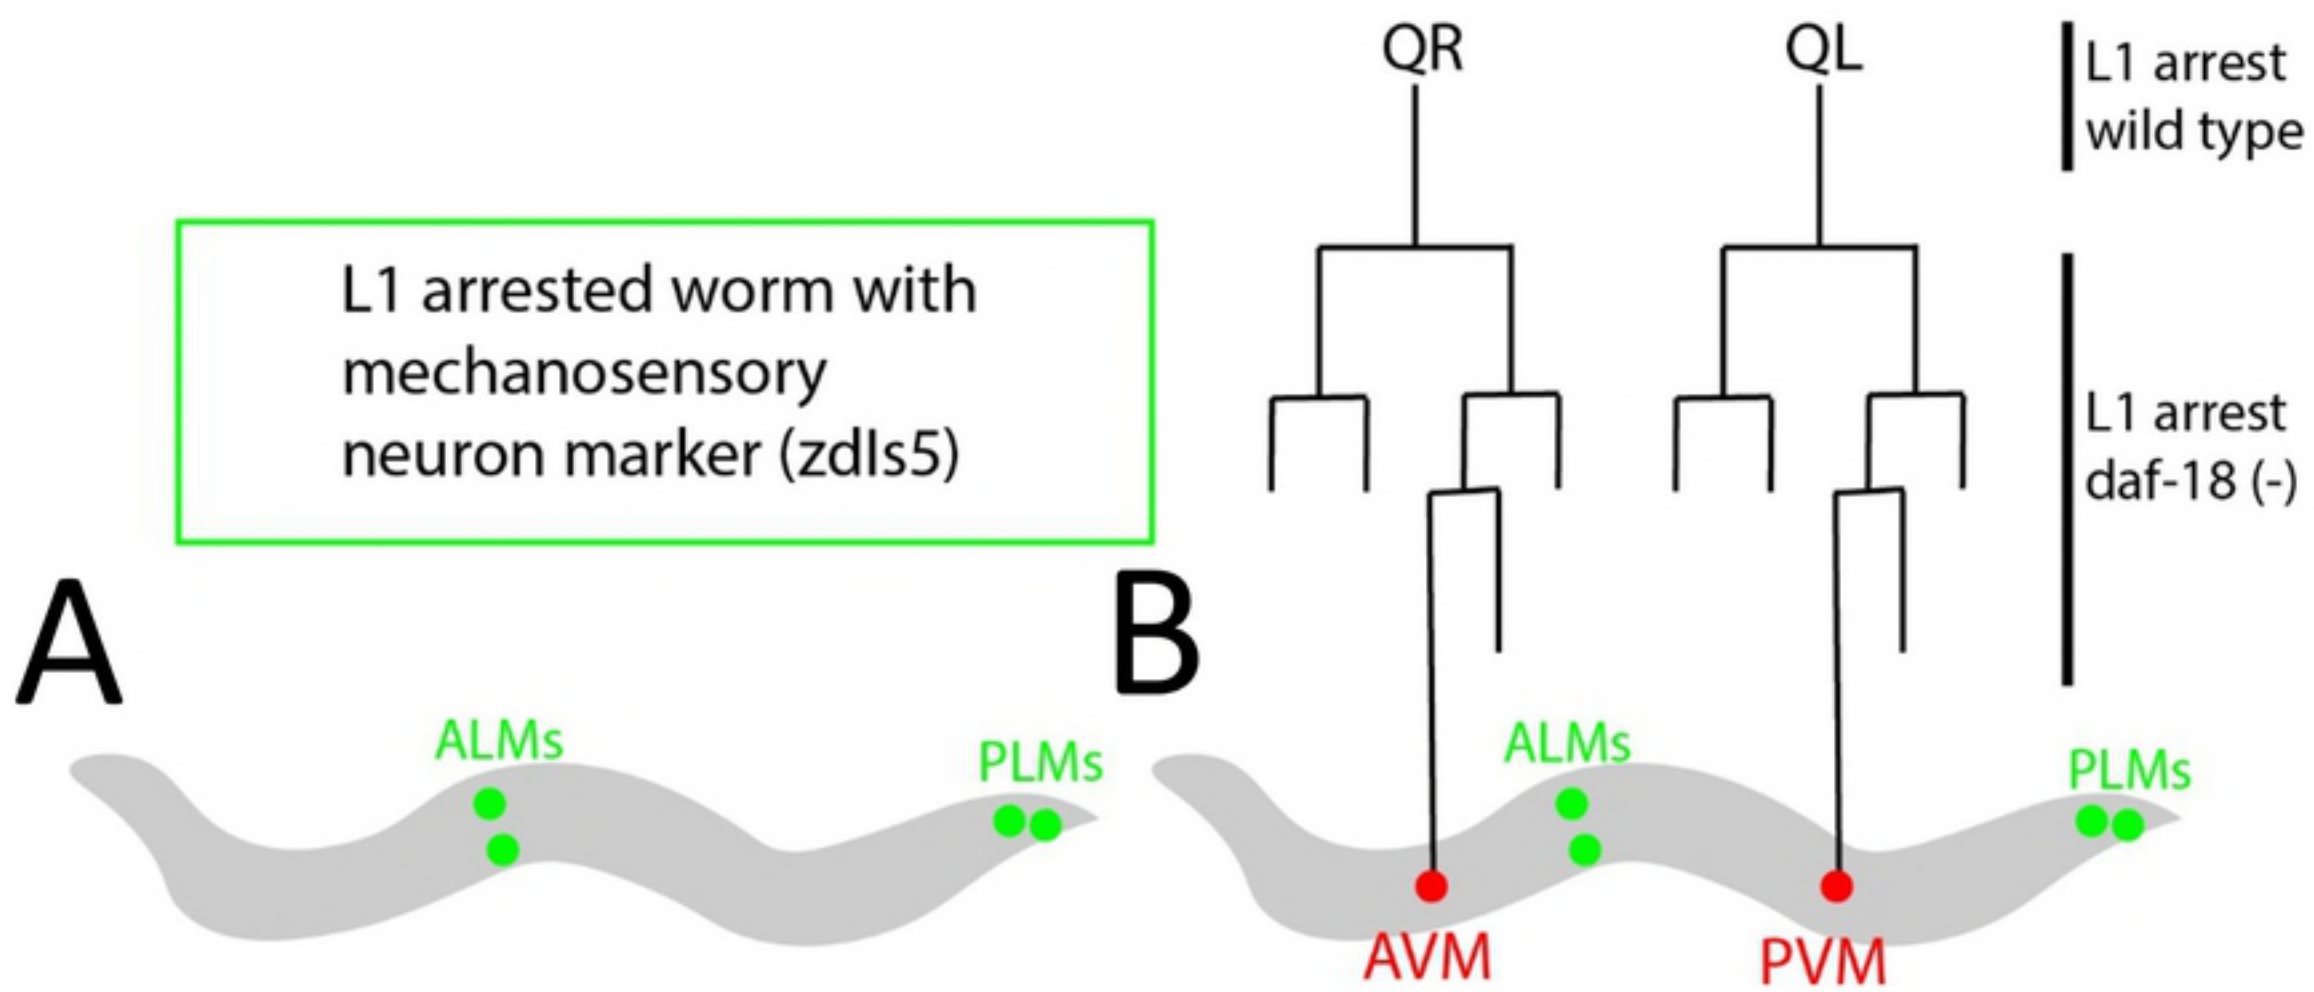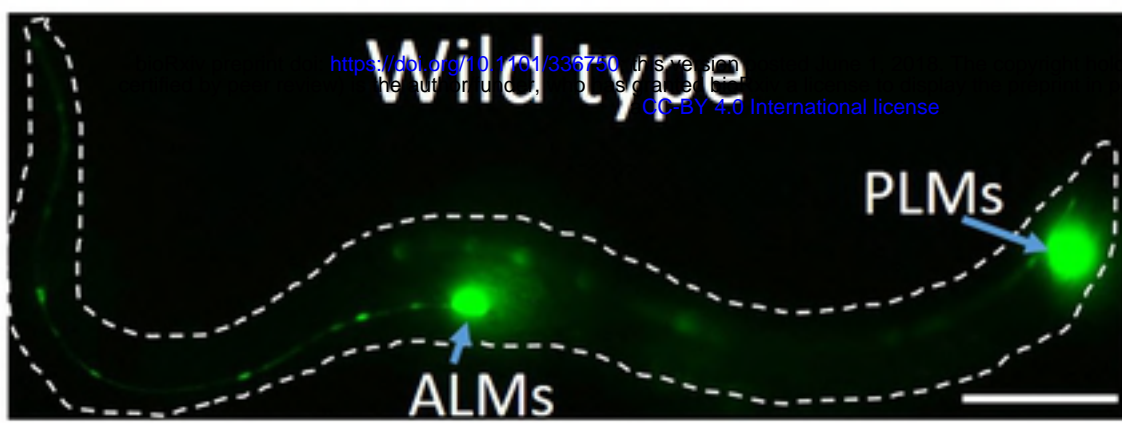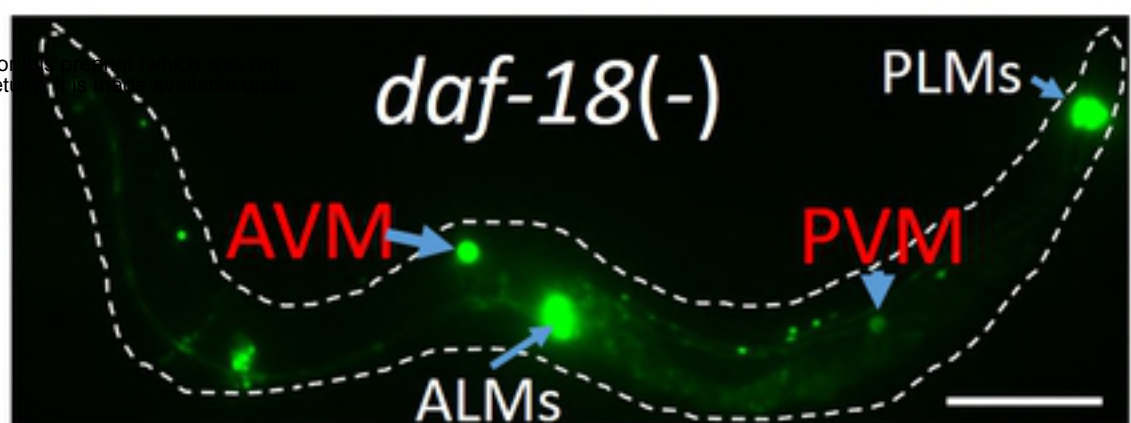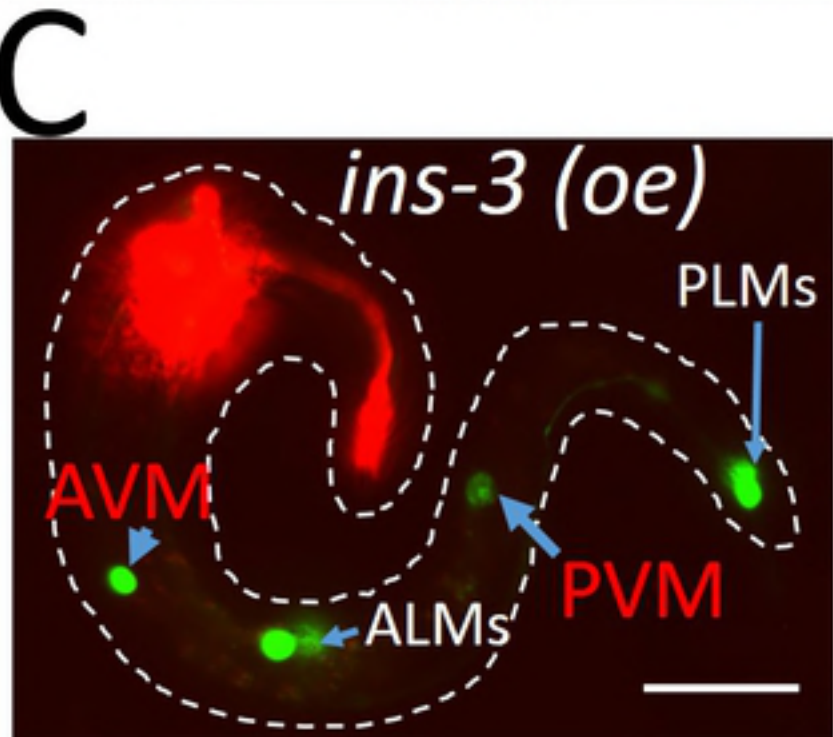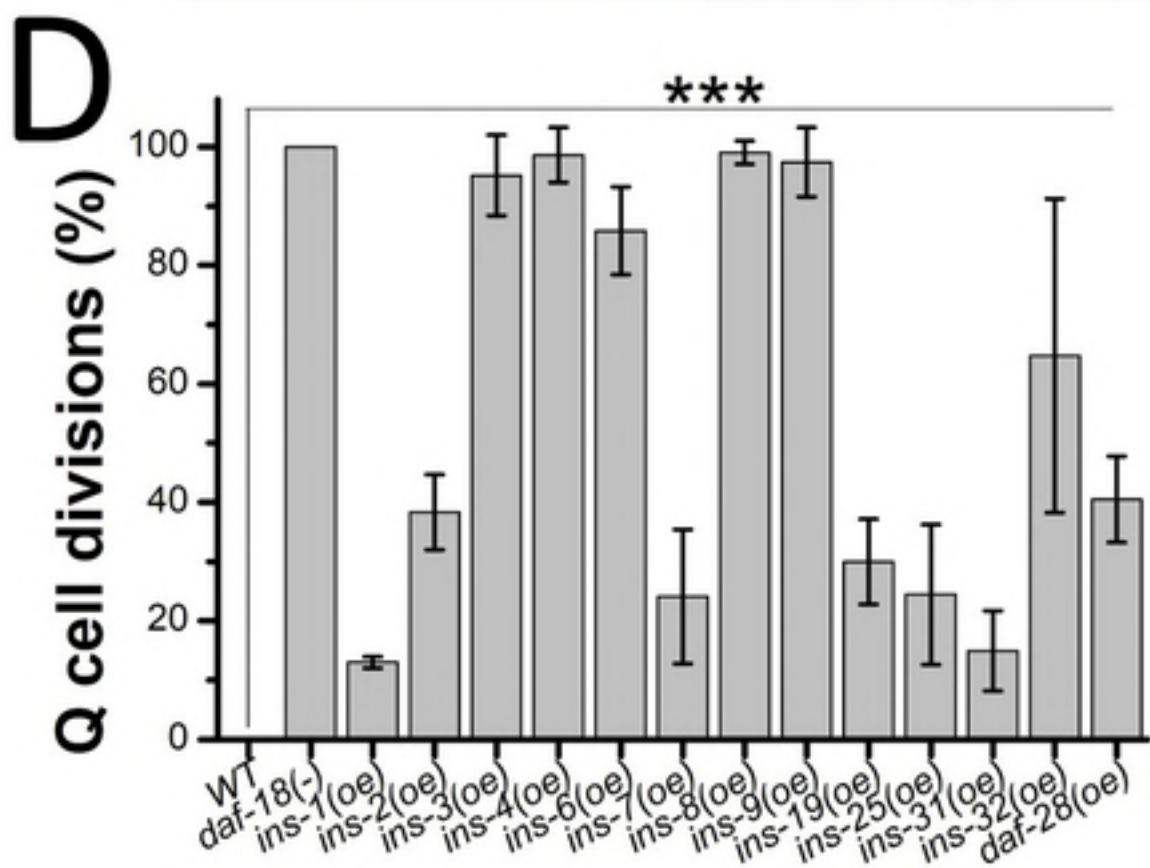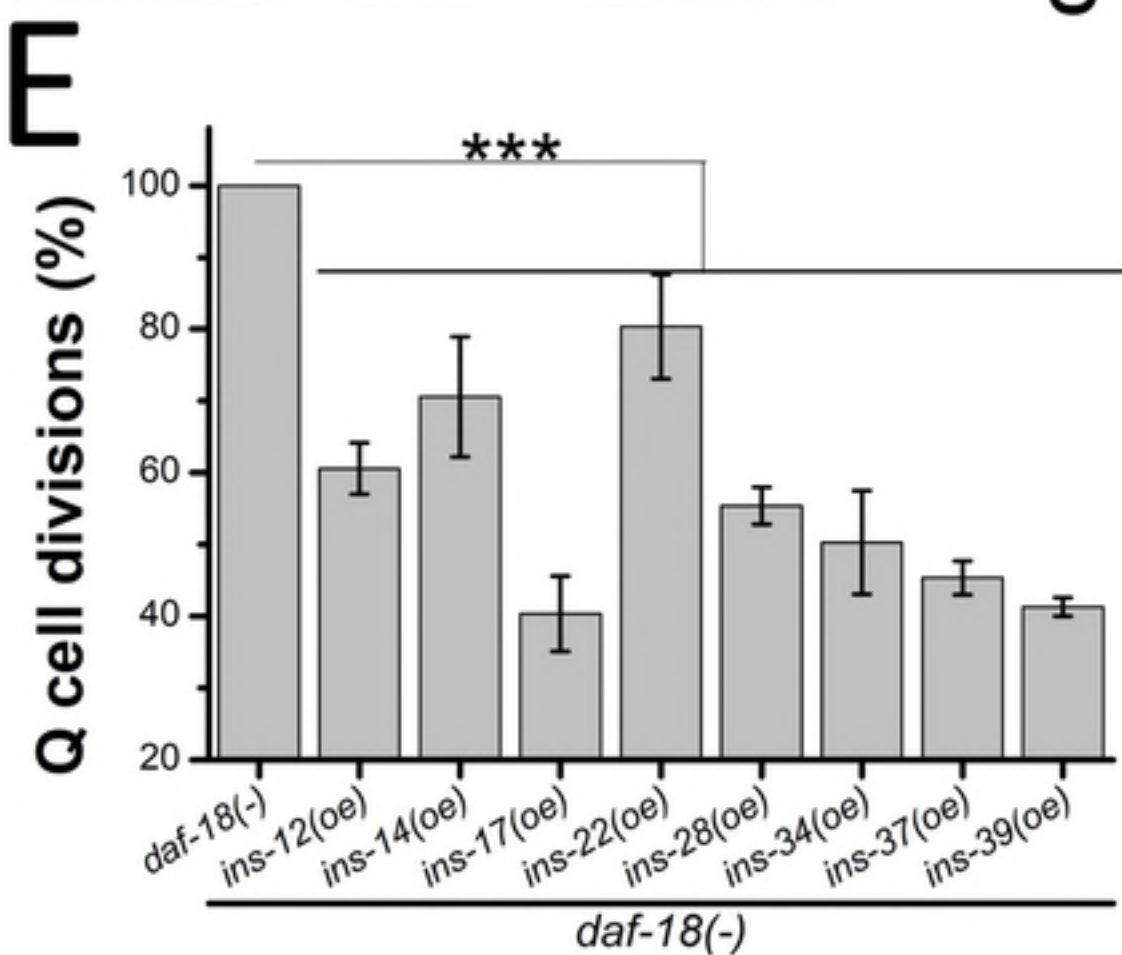

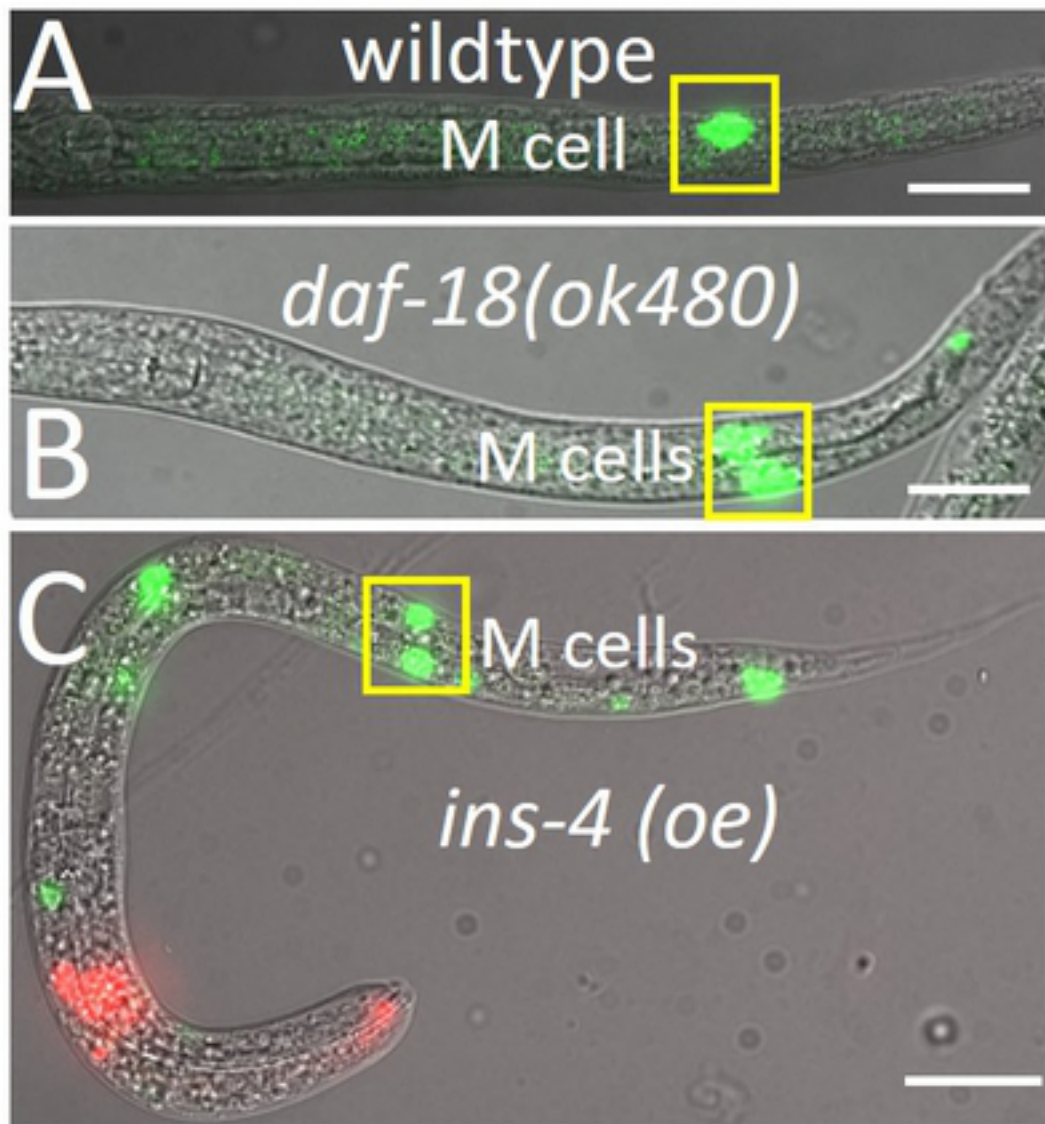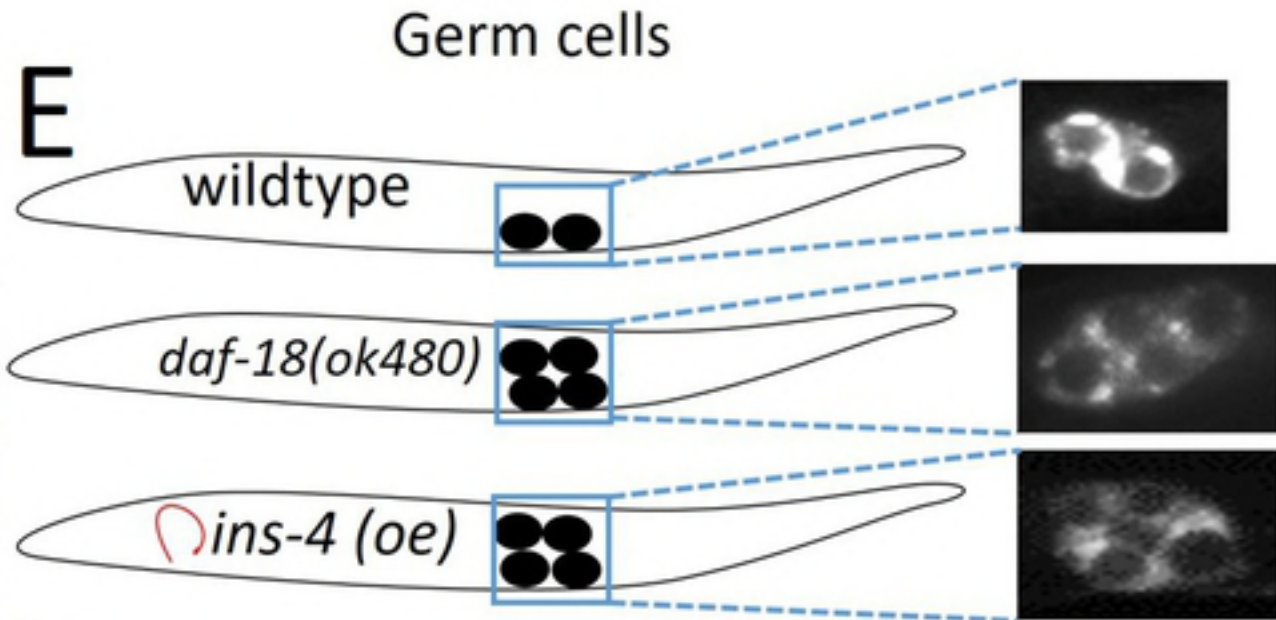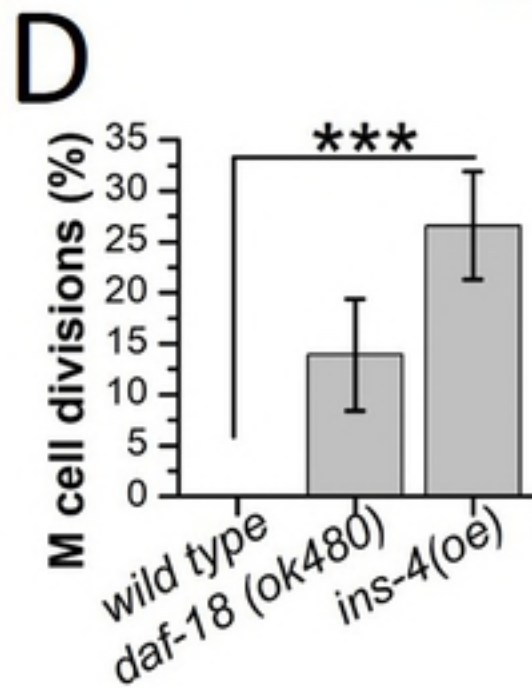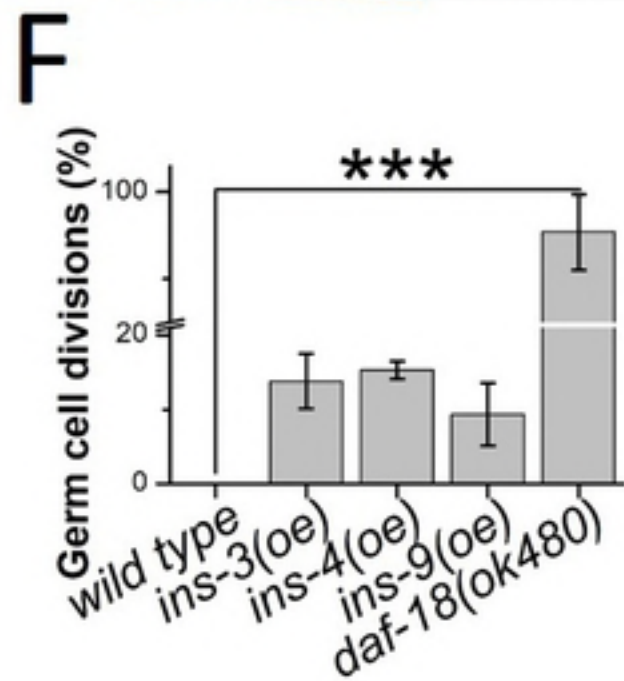

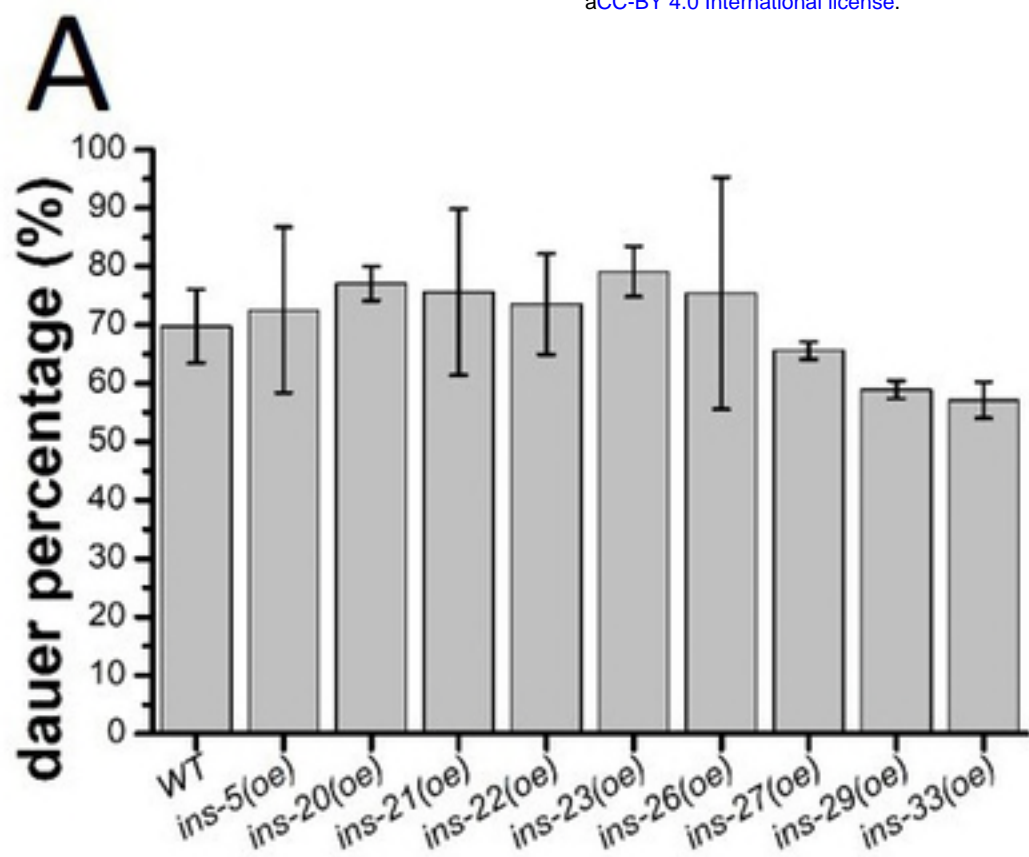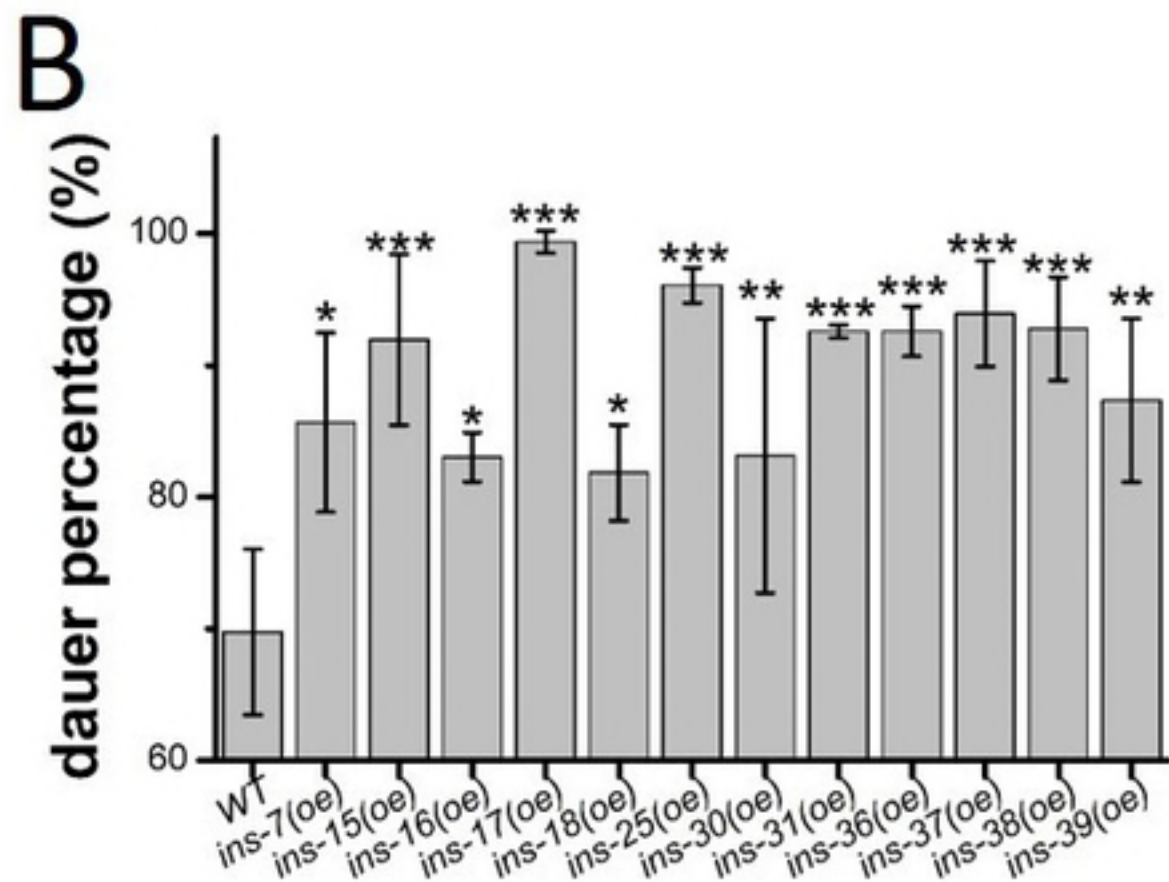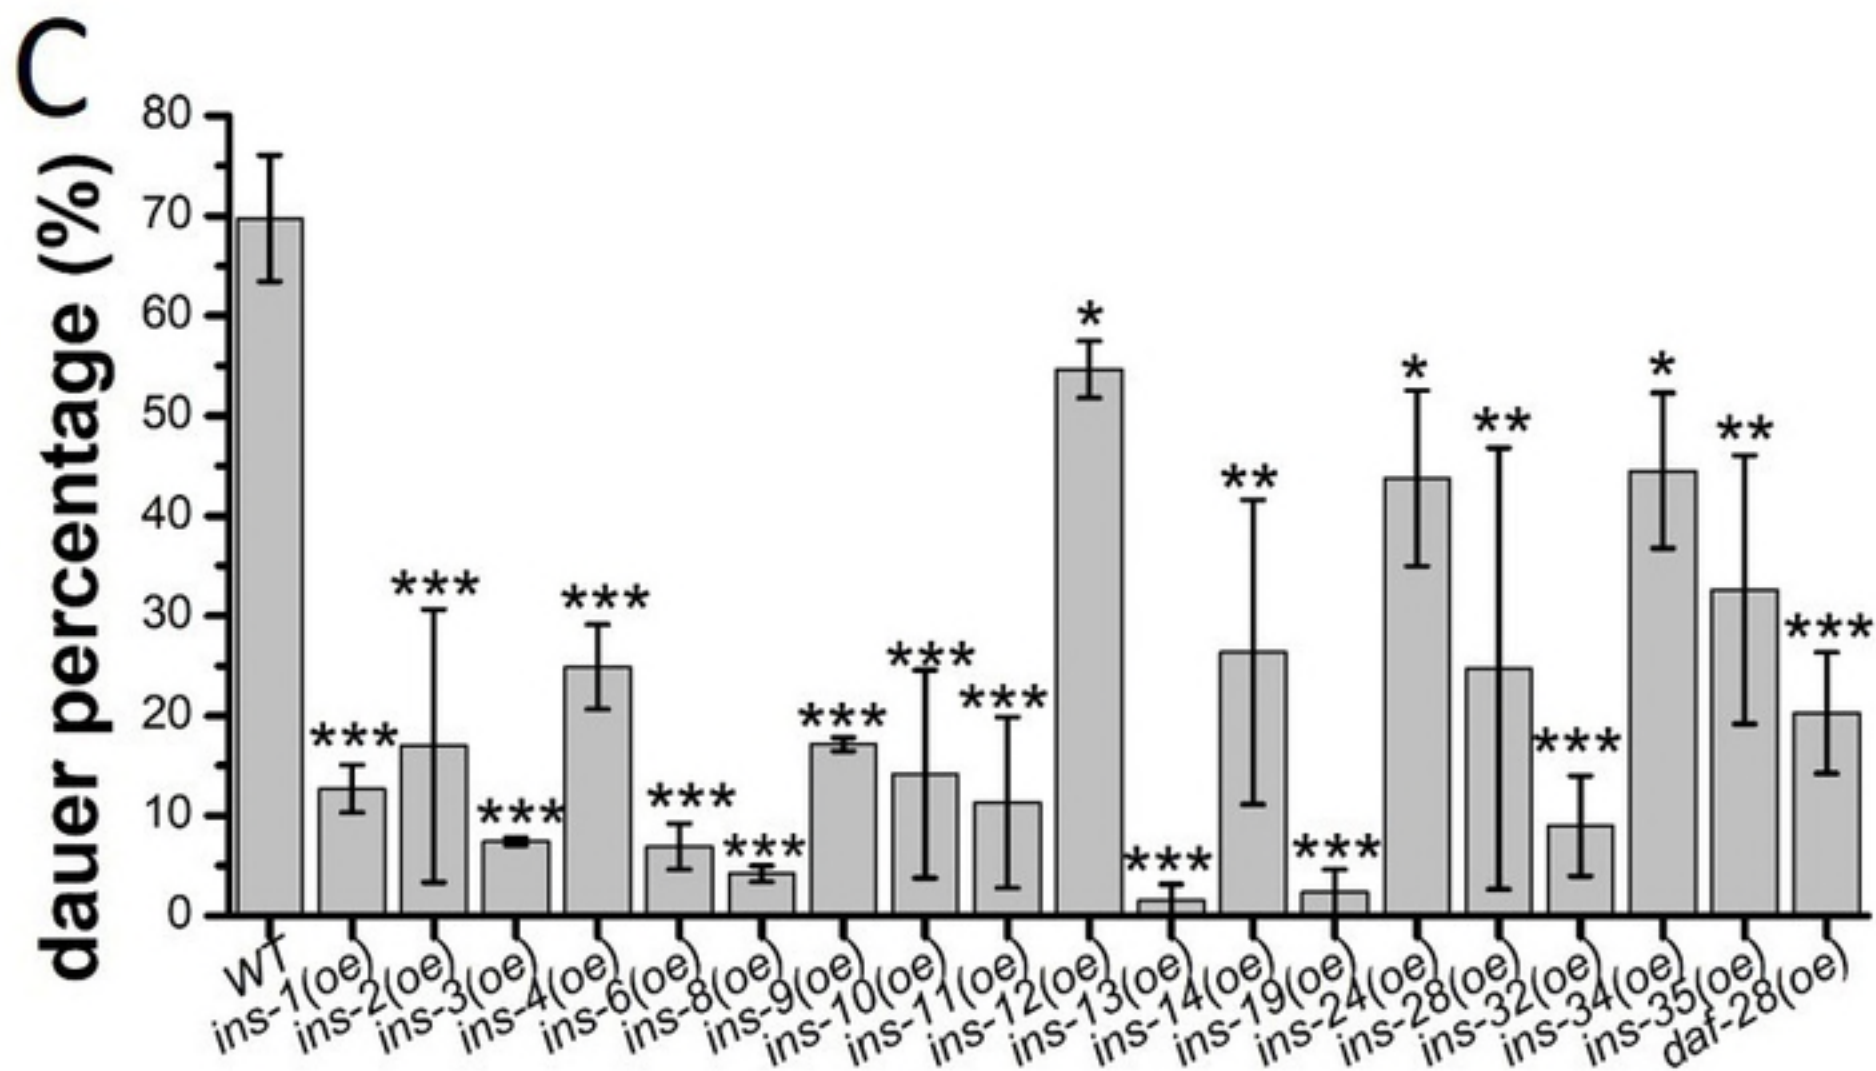

**A**

Wild type

*daf-18(-)**daf-2(-)**ins-8(oe)**ins-4(oe)***B**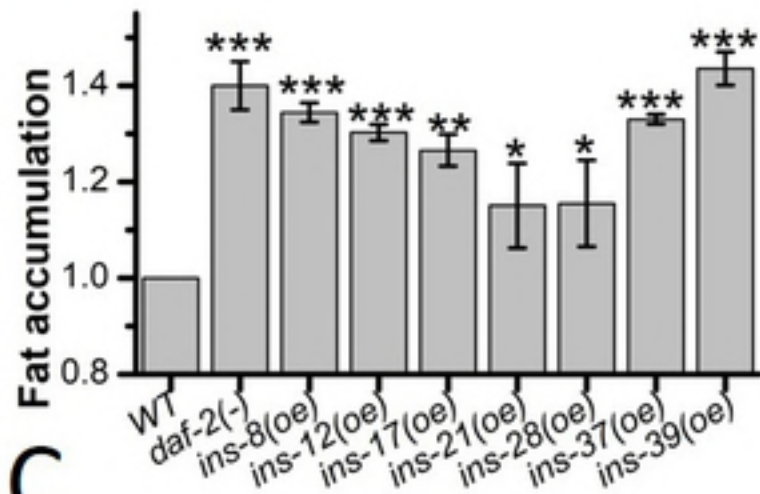**C**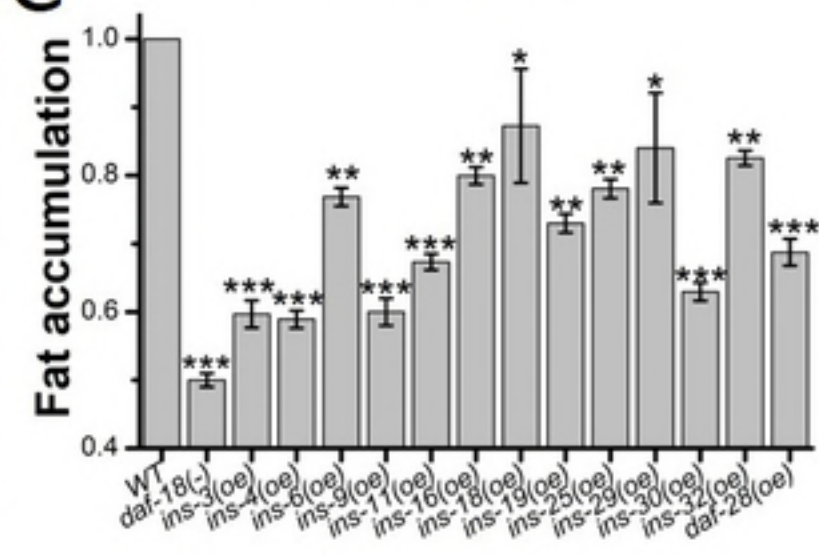

**A**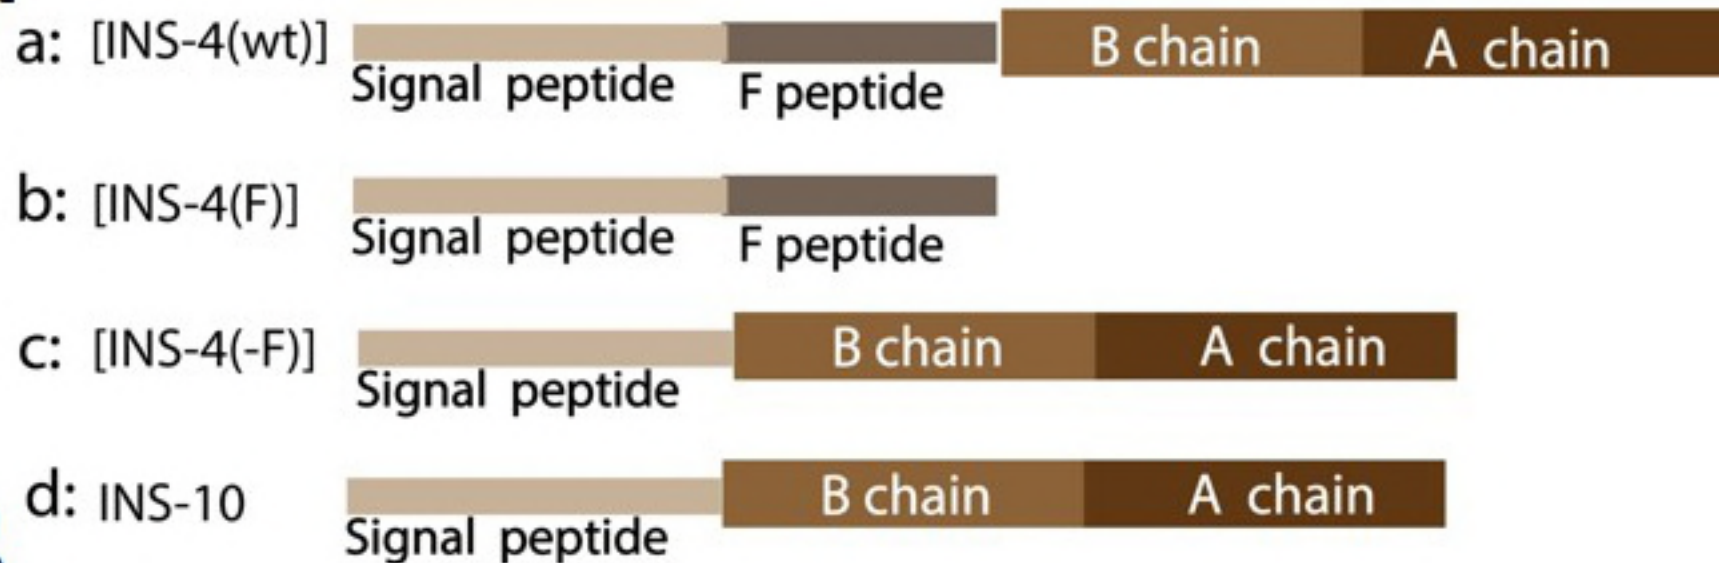**B**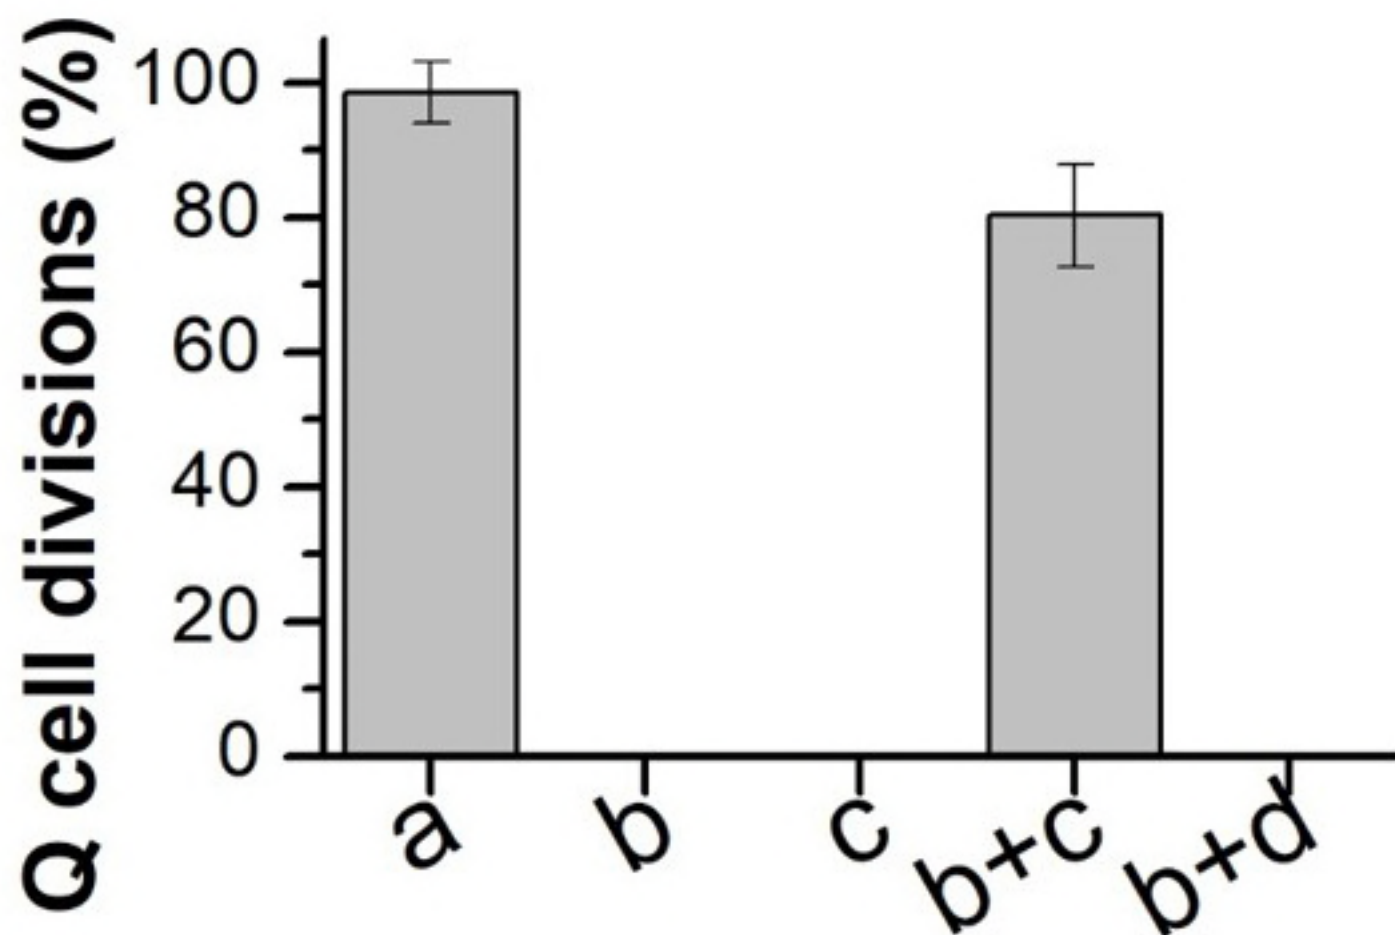



**A**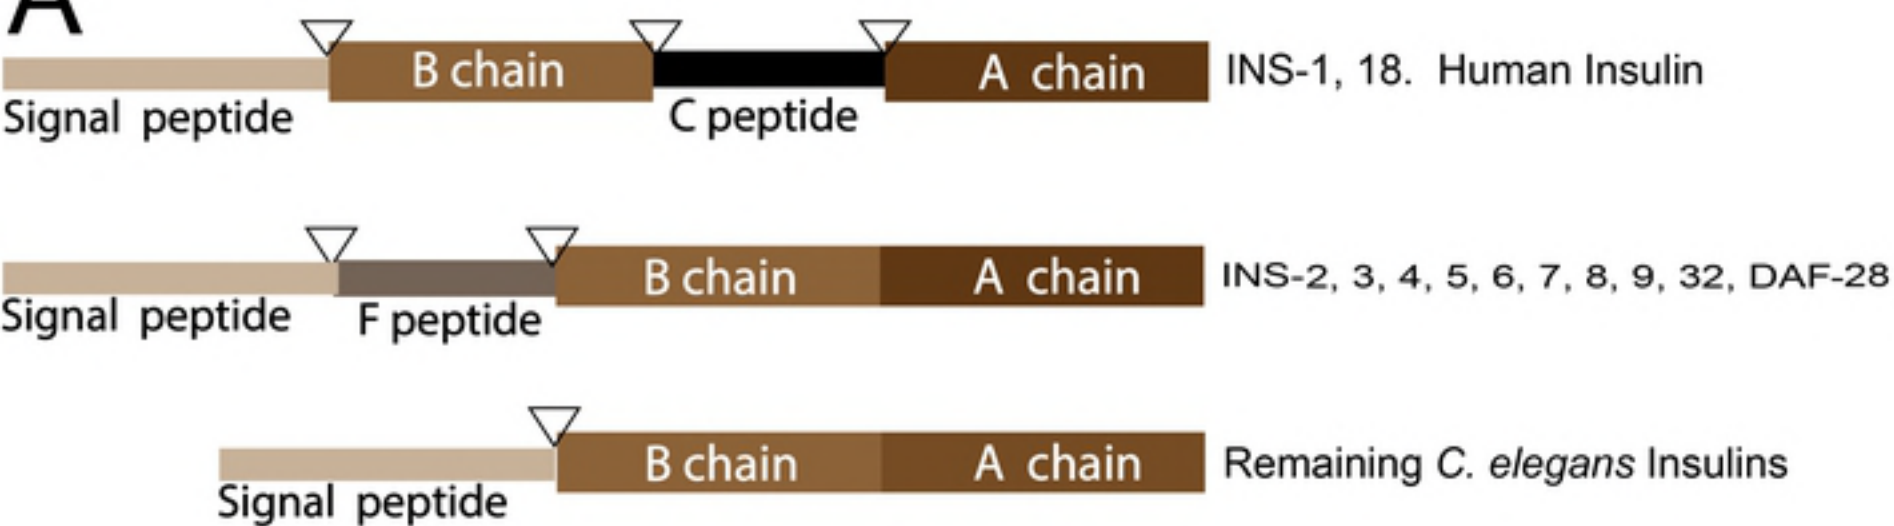**B**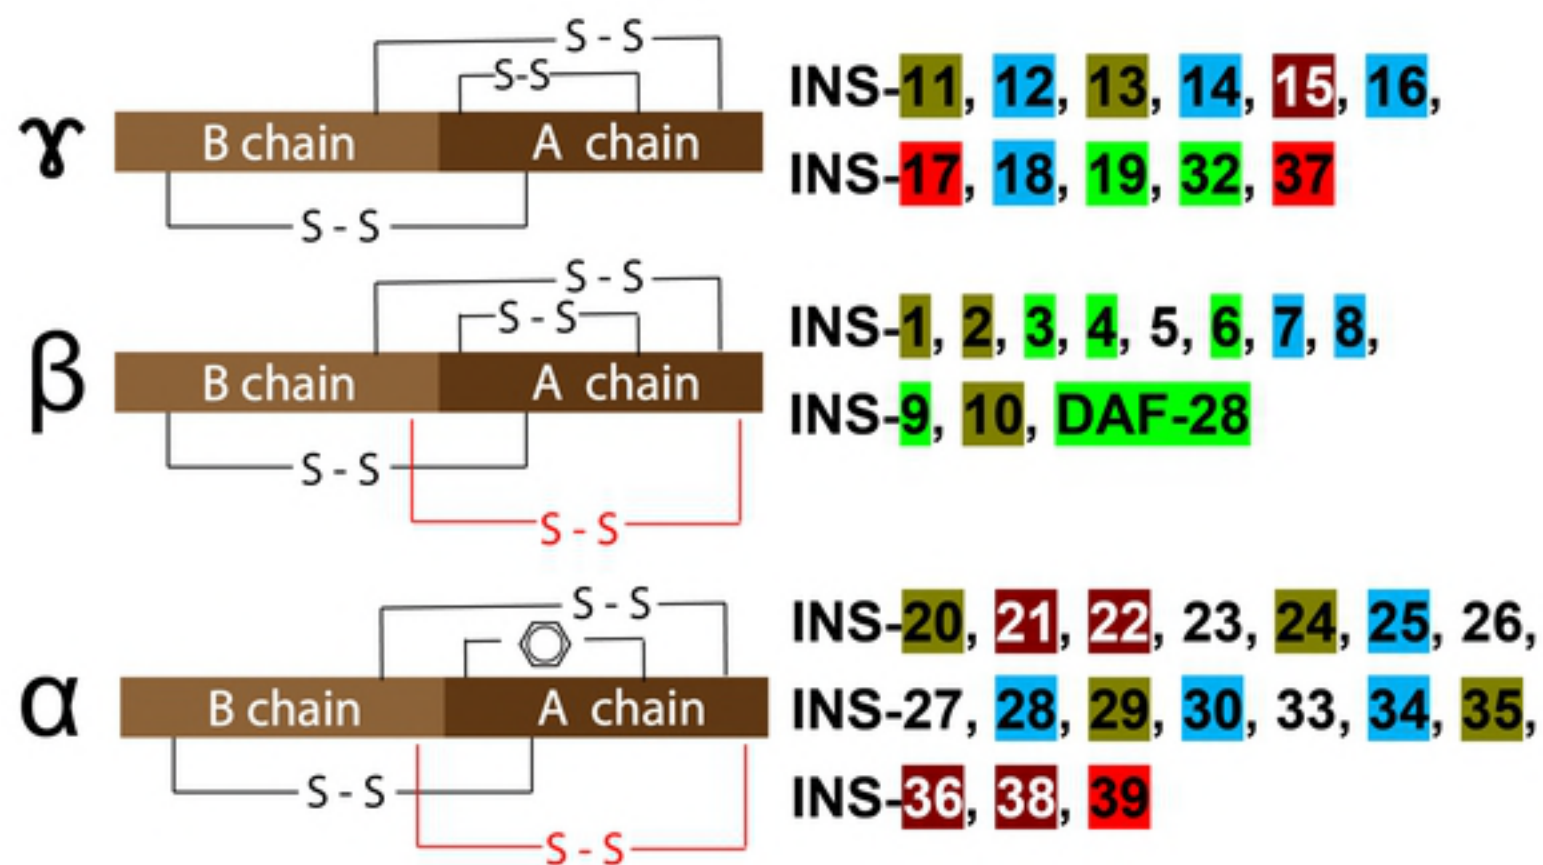

■ Strong Agonist    ■ Weak Antagonist  
■ Weak Agonist    ■ Diverse Ligands  
■ Strong Antagonist    □ Neutral Ligands

INS-31A, 31B, 31C
